# Supplementary material for: MED15 is upregulated by HIF-2α and promotes proliferation and metastasis in clear cell renal cell carcinoma via activation of SREBP-dependent fatty acid synthesis
Source: PubMed Central journal article supplement (PMC11035615; doi:10.1038/s41420-024-01944-1), 2024-04-22

**Figure 1G**

MED15  
(105KDa)

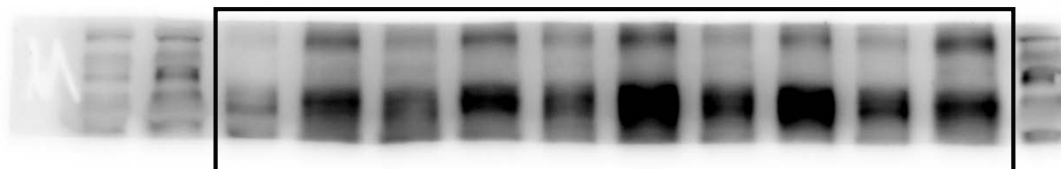

← 100

GAPDH  
(37KDa)

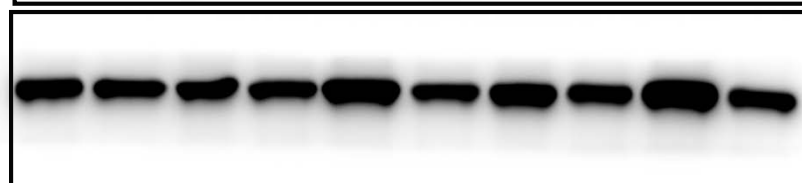

← 35

MED15  
(105KDa)

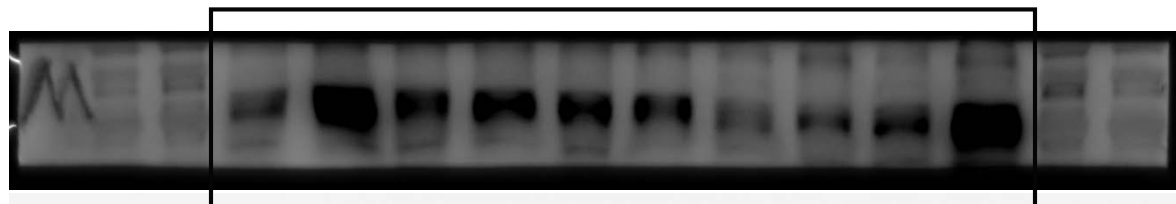

← 100

GAPDH  
(37KDa)

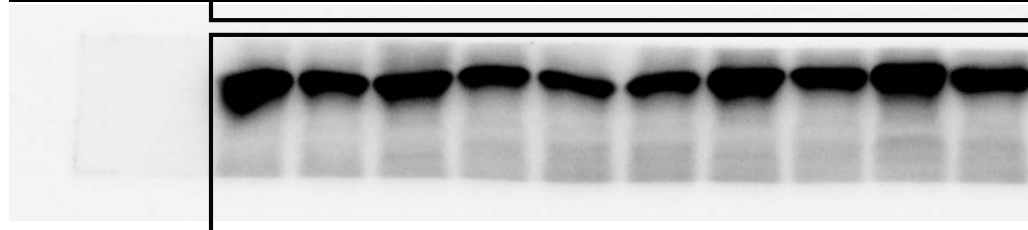

← 35

**Figure 1I**

MED15  
(105KDa)

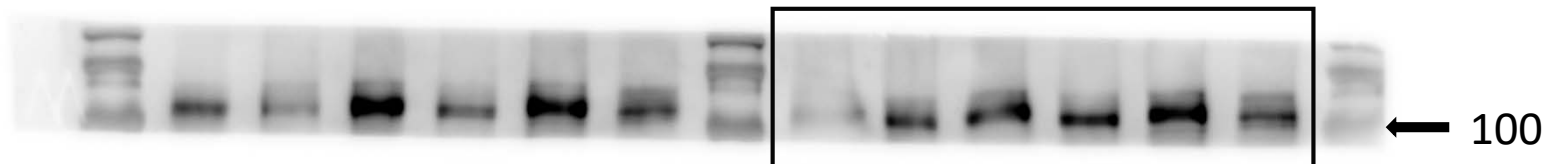

GAPDH  
(37KDa)

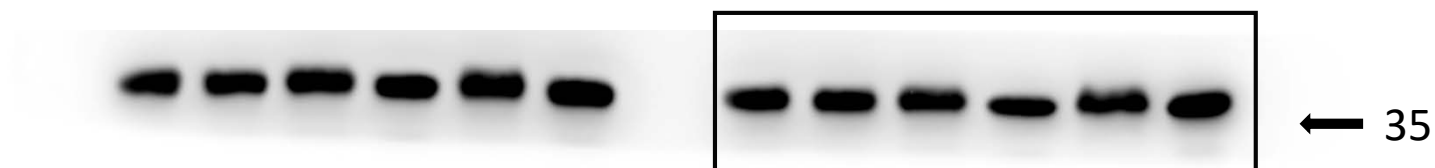

**Figure 2A**

786-O

MED15  
(105KDa)

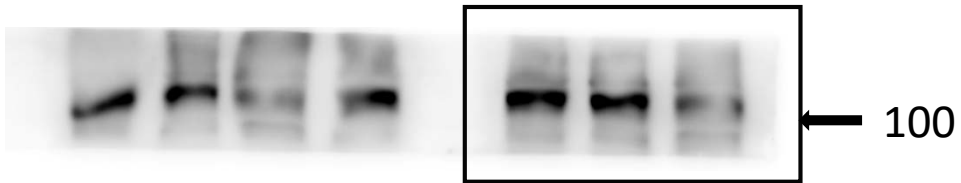

GAPDH  
(37KDa)

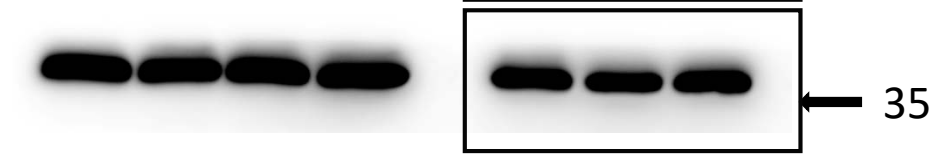

OS-RC-2

MED15  
(105KDa)

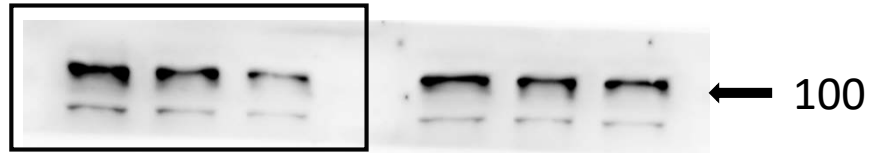

GAPDH  
(37KDa)

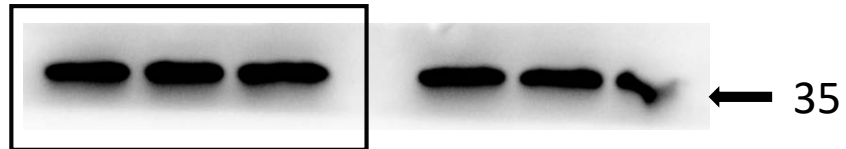

**Figure 2H**

786-O

MED15  
(105KDa)

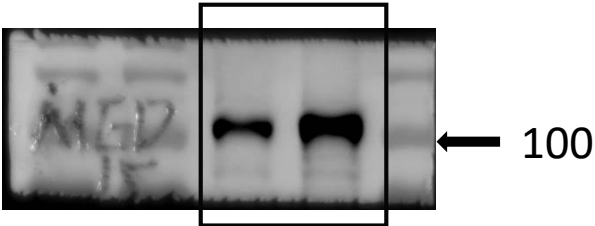

GAPDH  
(37KDa)

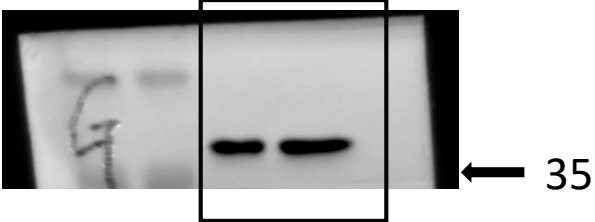

OS-RC-2

MED15  
(105KDa)

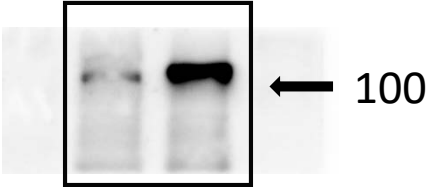

GAPDH  
(37KDa)

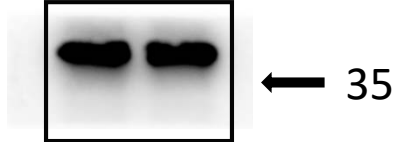

**Figure 4**

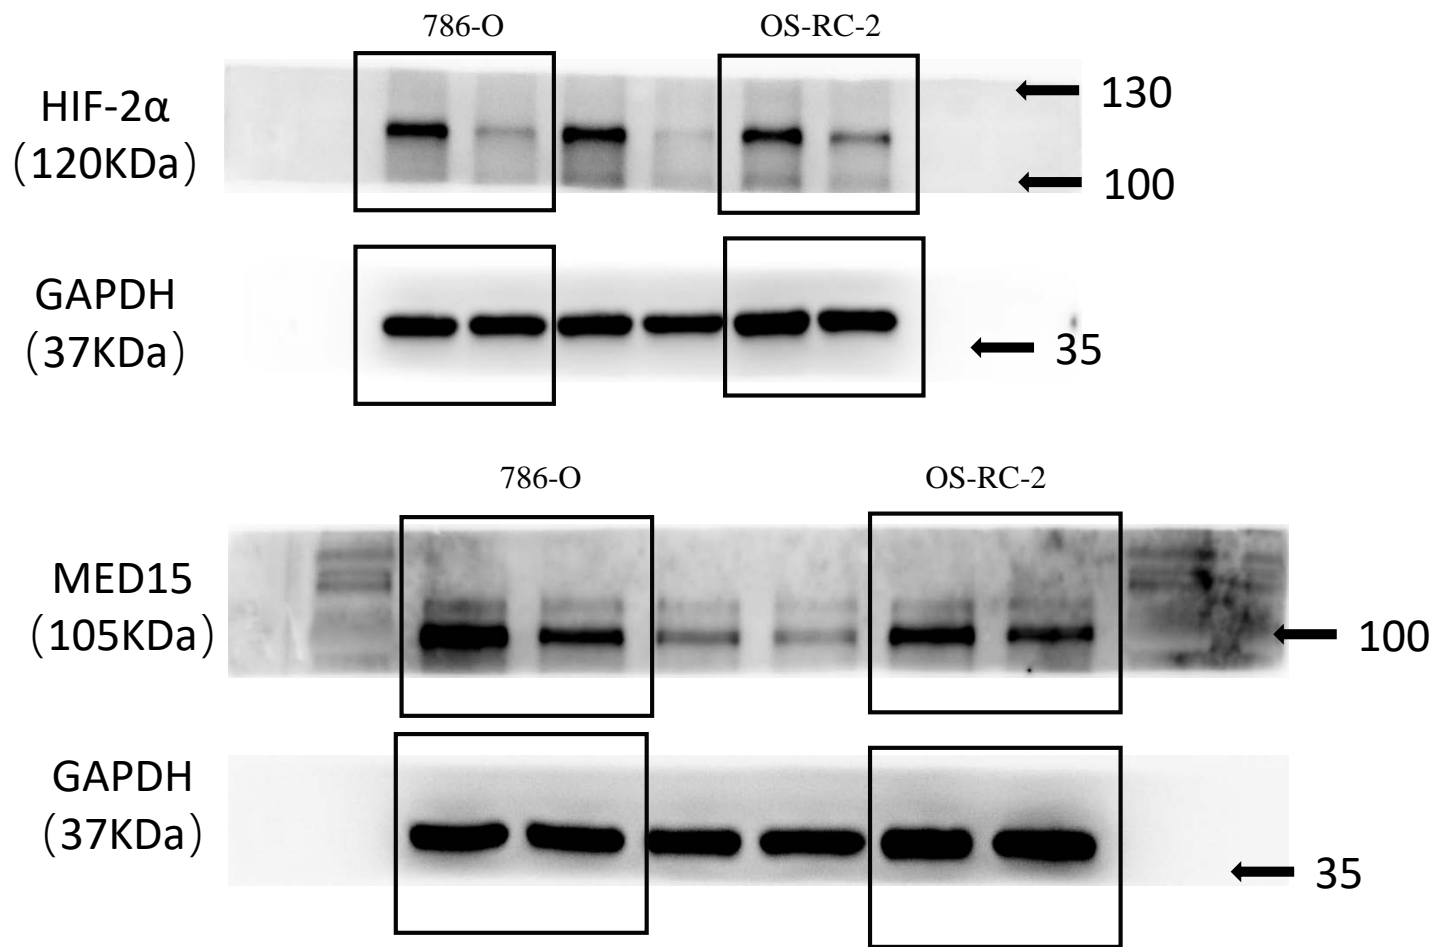

**Figure 5C**

786-O

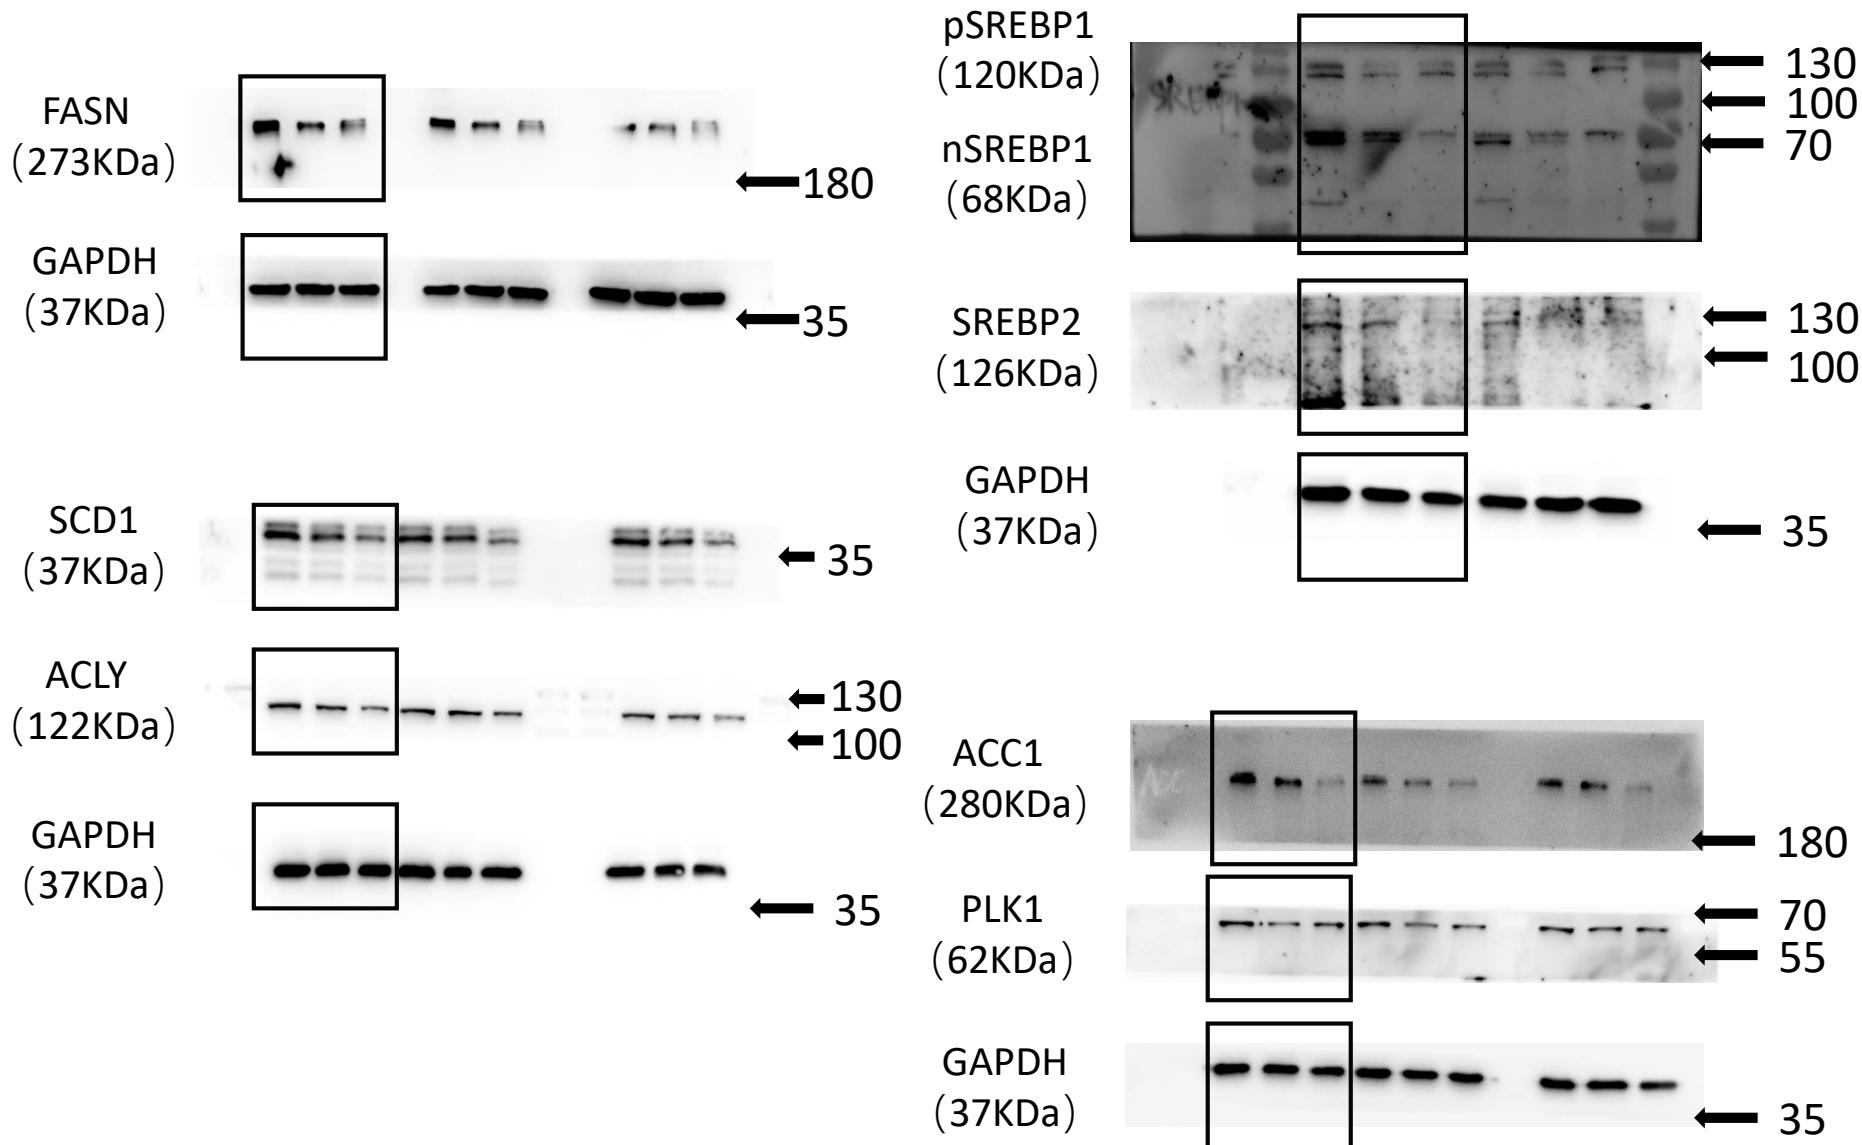

# Figure 5C

OS-RC-2

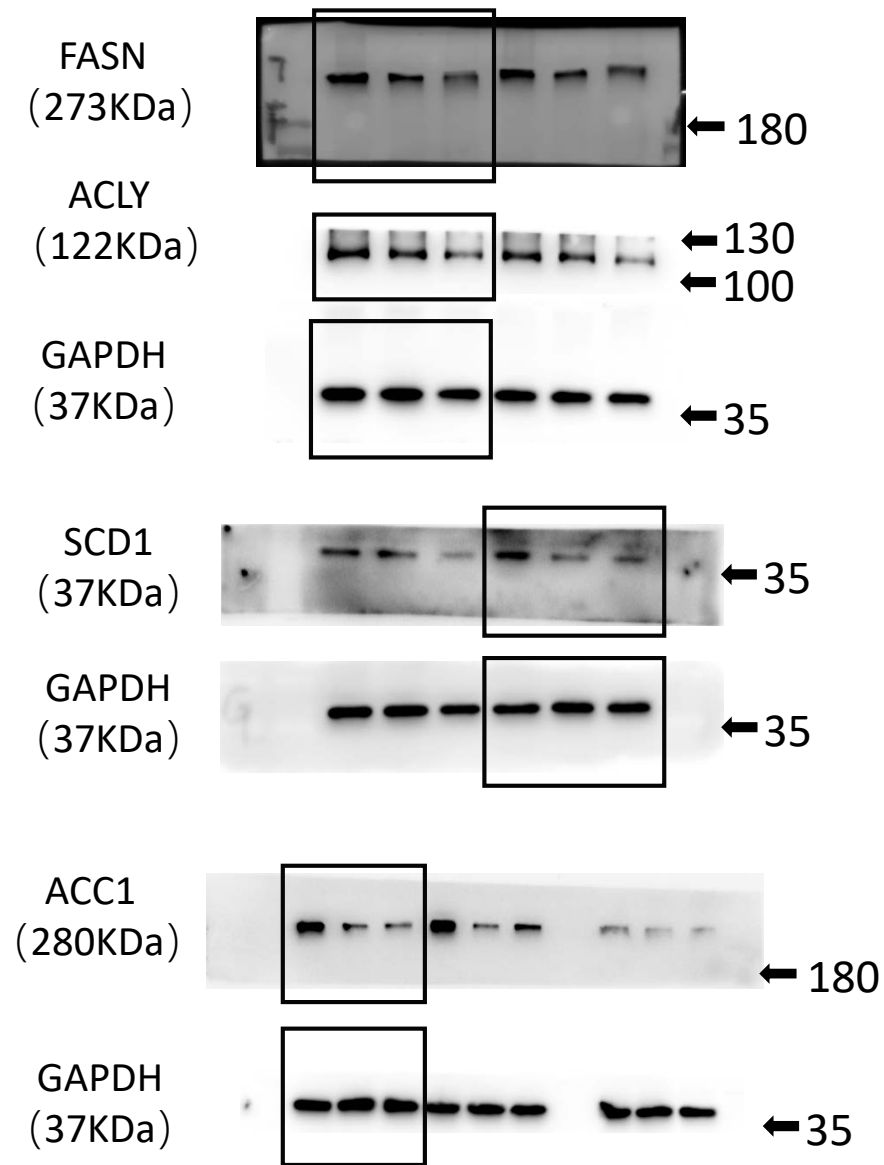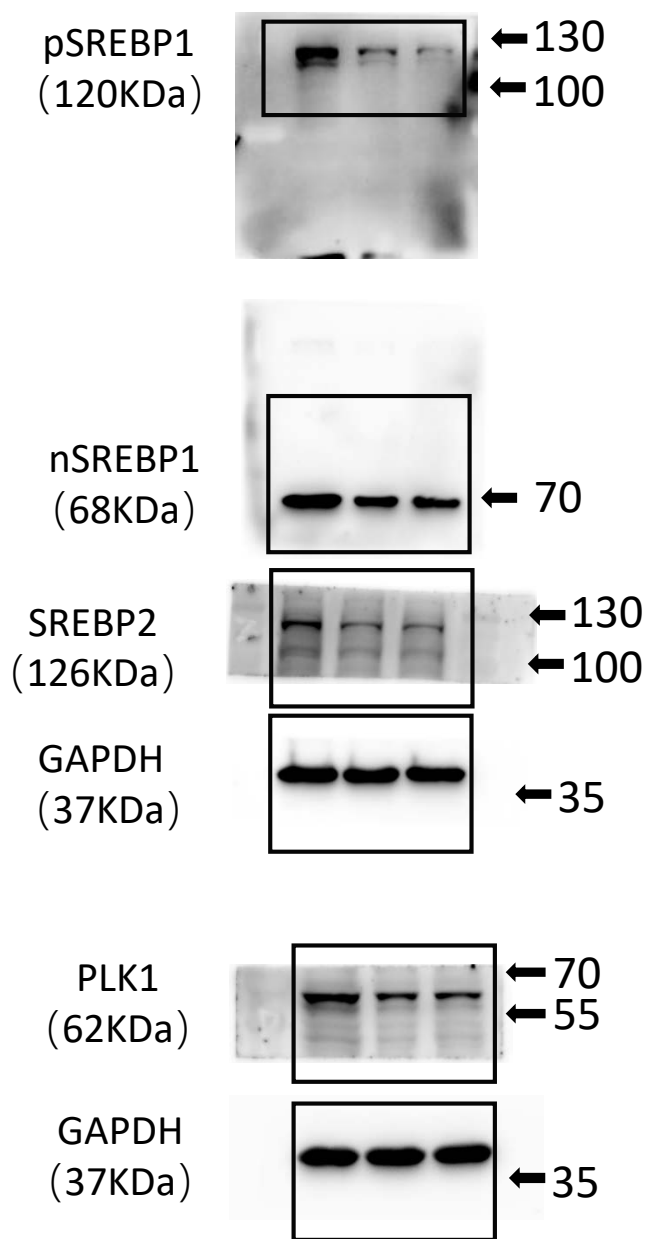

# Figure 5E

786-O

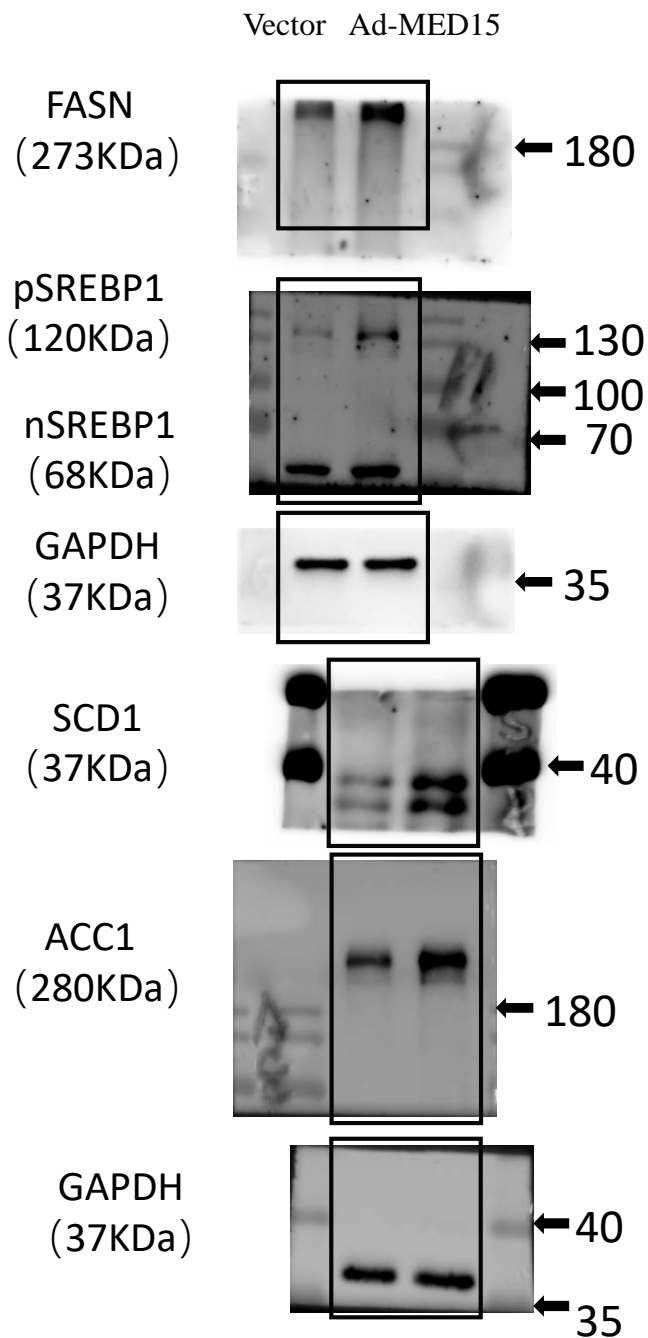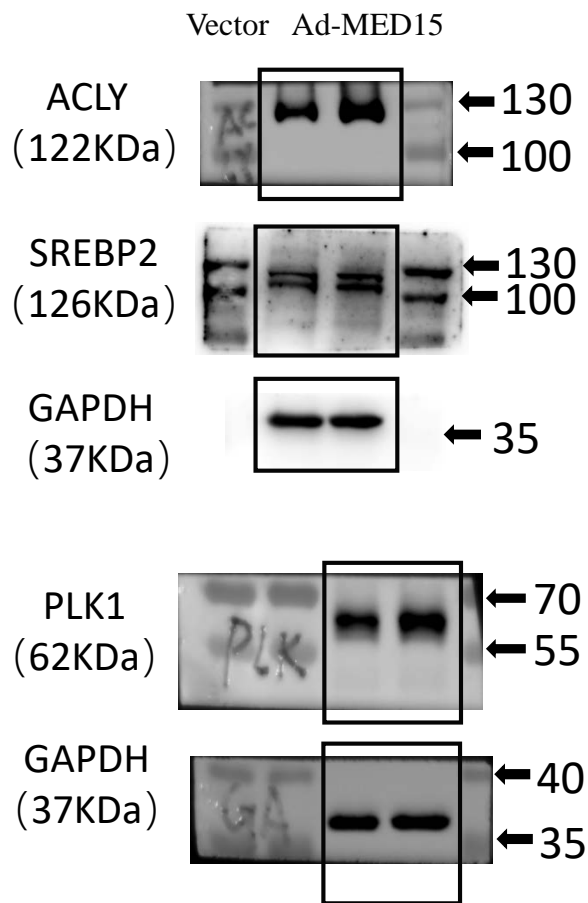



# Figure 5E

OS-RC-2

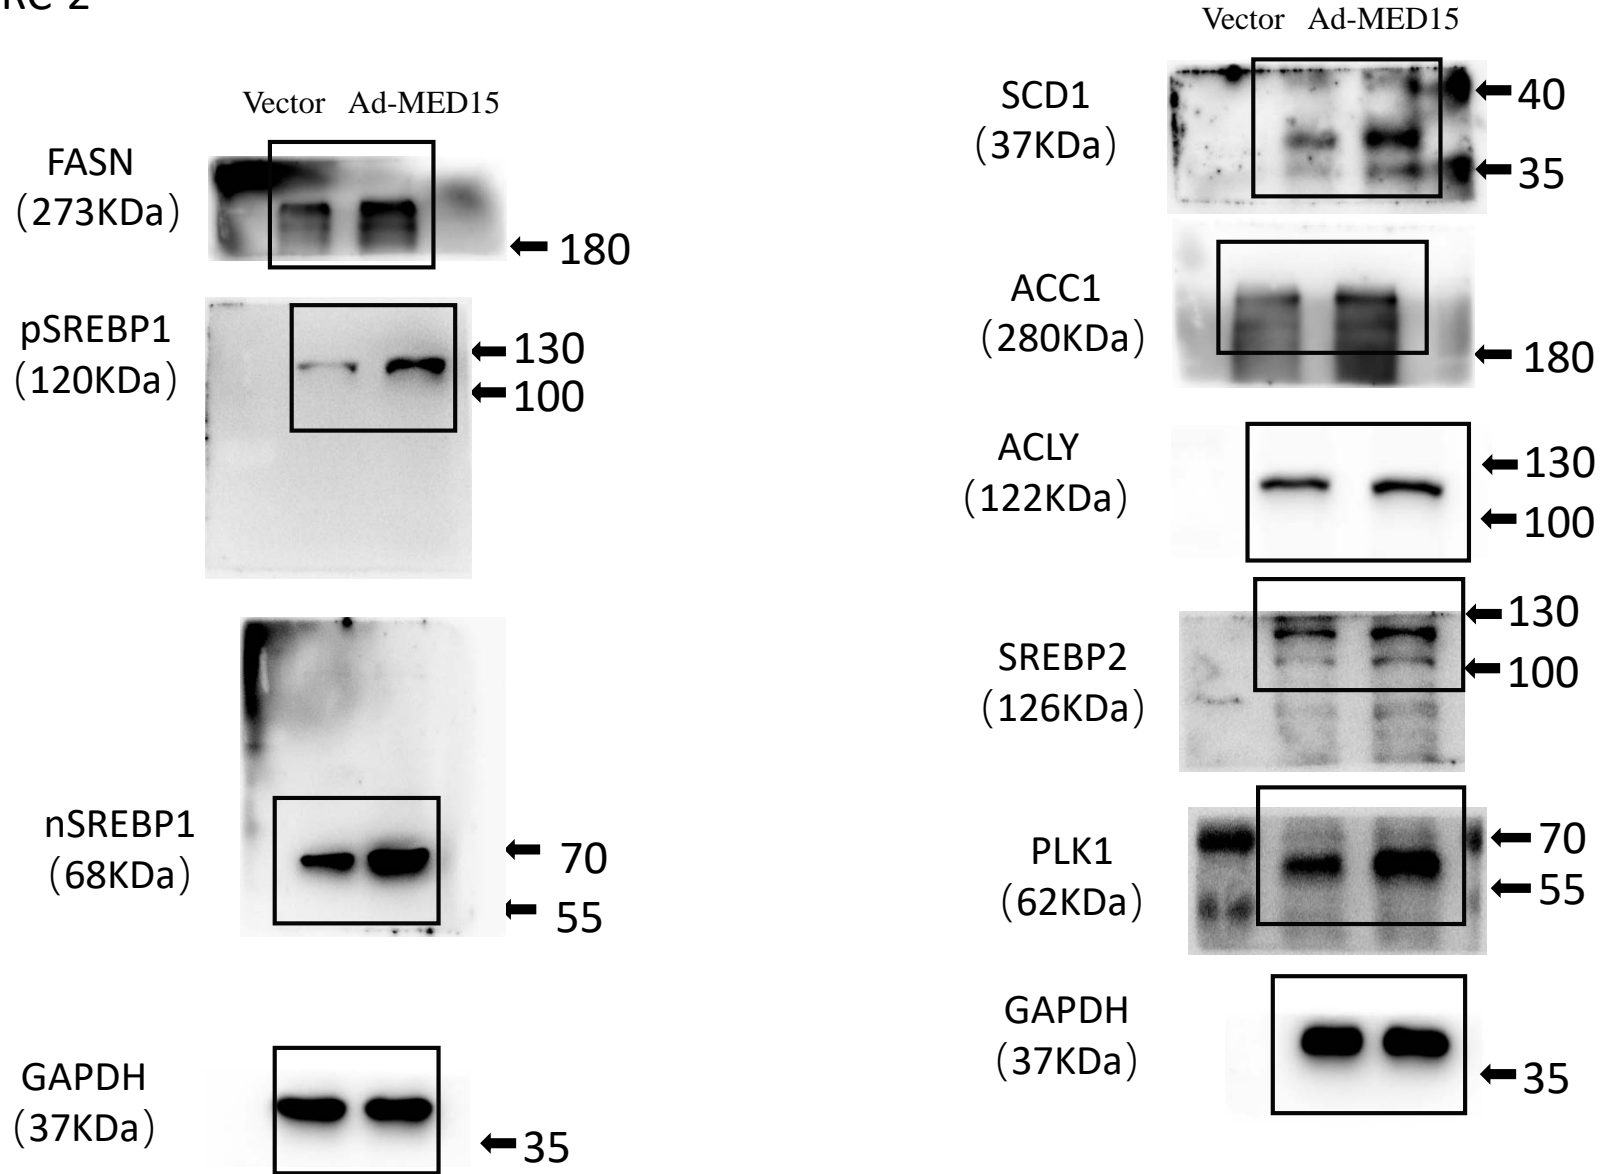

**Figure 5G**

786-O

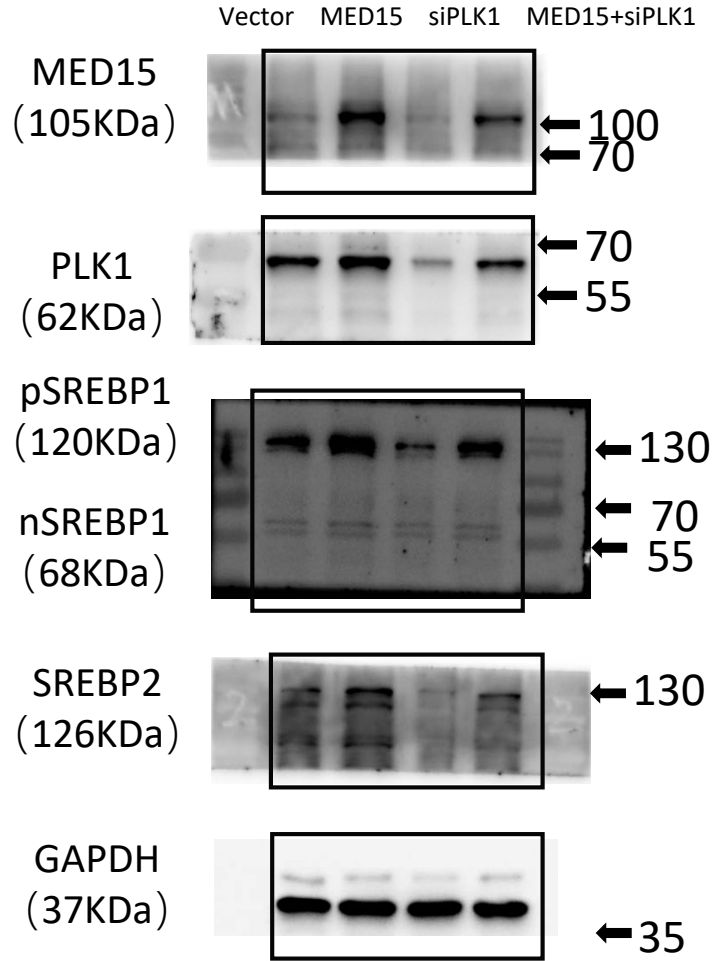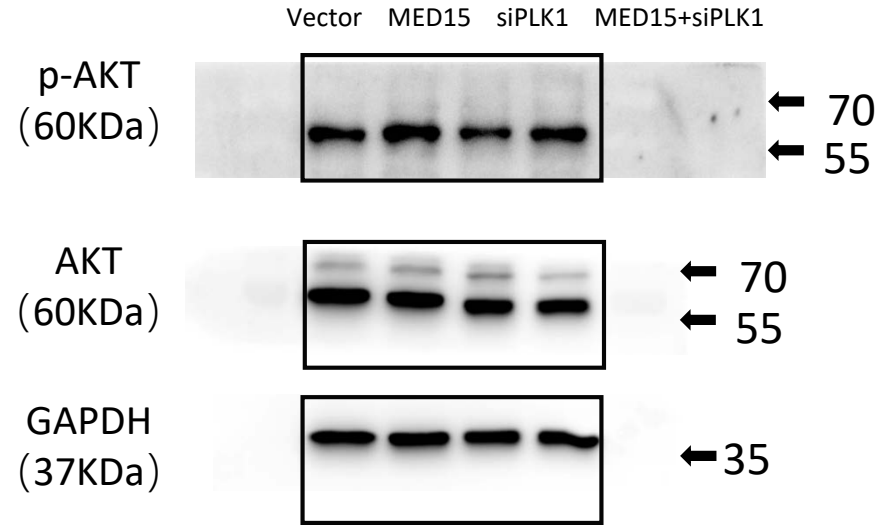

# Figure 5G

OS-RC-2

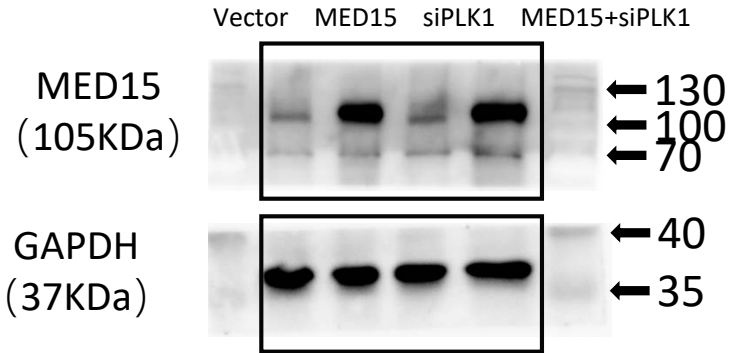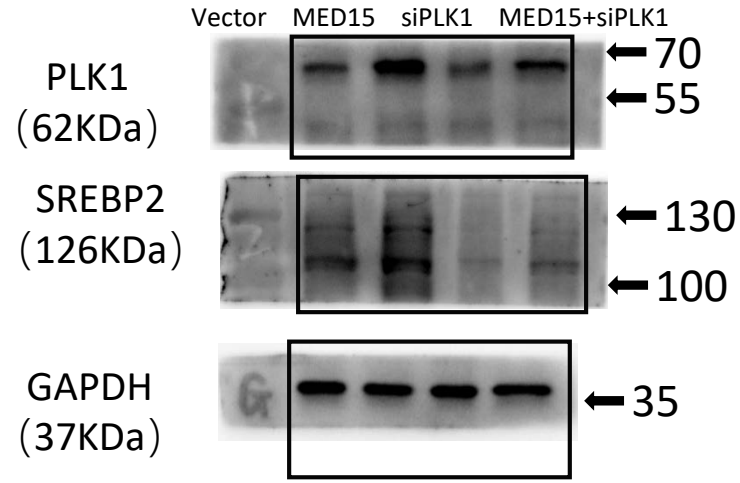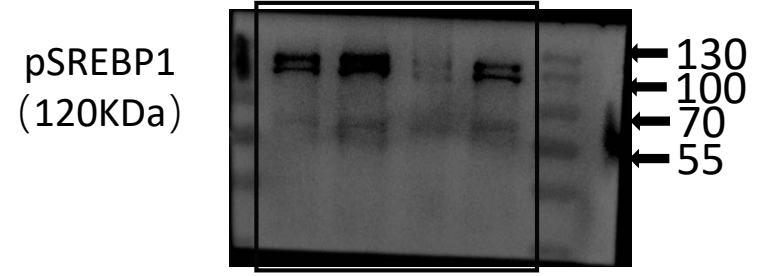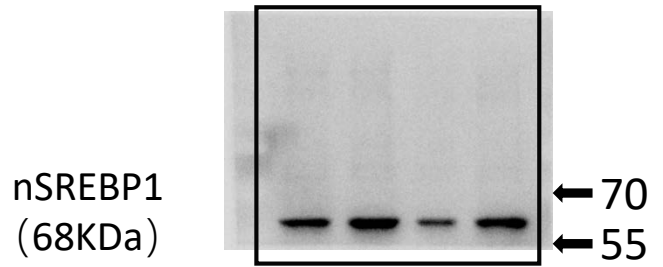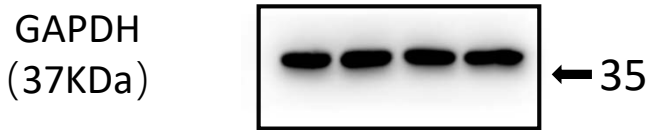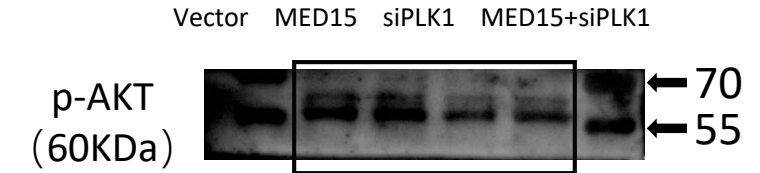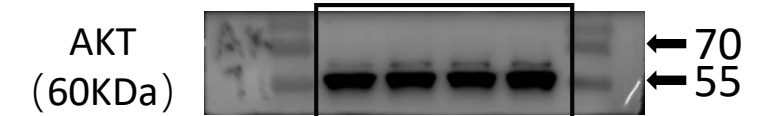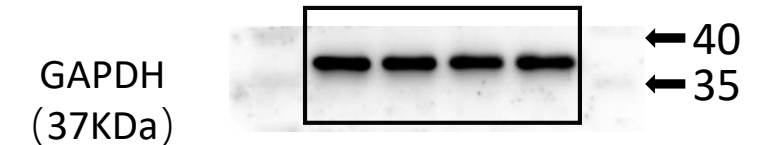

**Figure 6A**

786-O

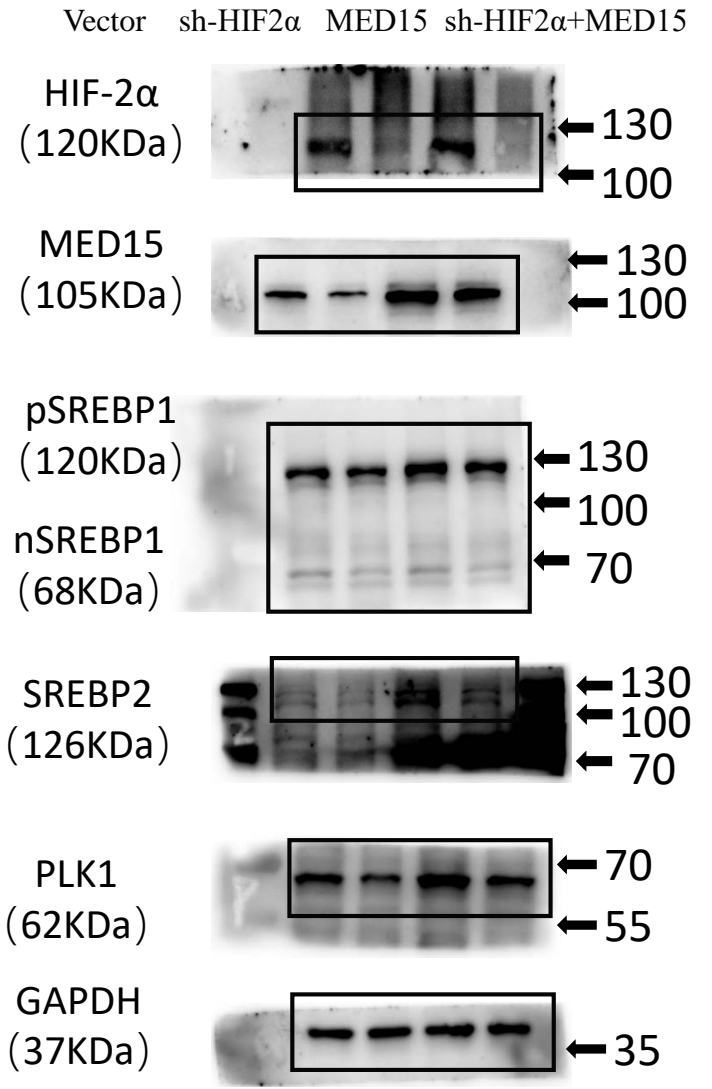

OS-RC-2

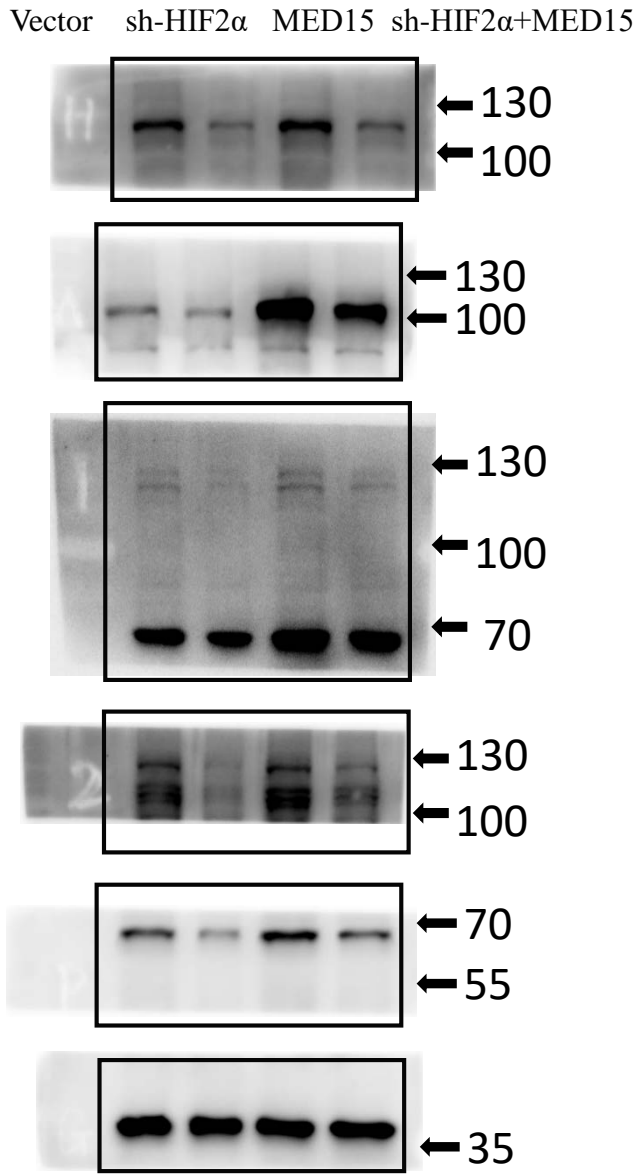

Supplement: 41420_2024_1944_MOESM3_ESM.pdf [file 41420_2024_1944_MOESM3_ESM.pdf]
