# Supplementary material for: MED15 is upregulated by HIF-2α and promotes proliferation and metastasis in clear cell renal cell carcinoma via activation of SREBP-dependent fatty acid synthesis
Source: PubMed Central journal article supplement (PMC11035615; doi:10.1038/s41420-024-01944-1), 2024-04-22
Supplement: 41420_2024_1944_MOESM1_ESM.pdf [file 41420_2024_1944_MOESM1_ESM.pdf]

1 **Supplementary Figures and Tables**

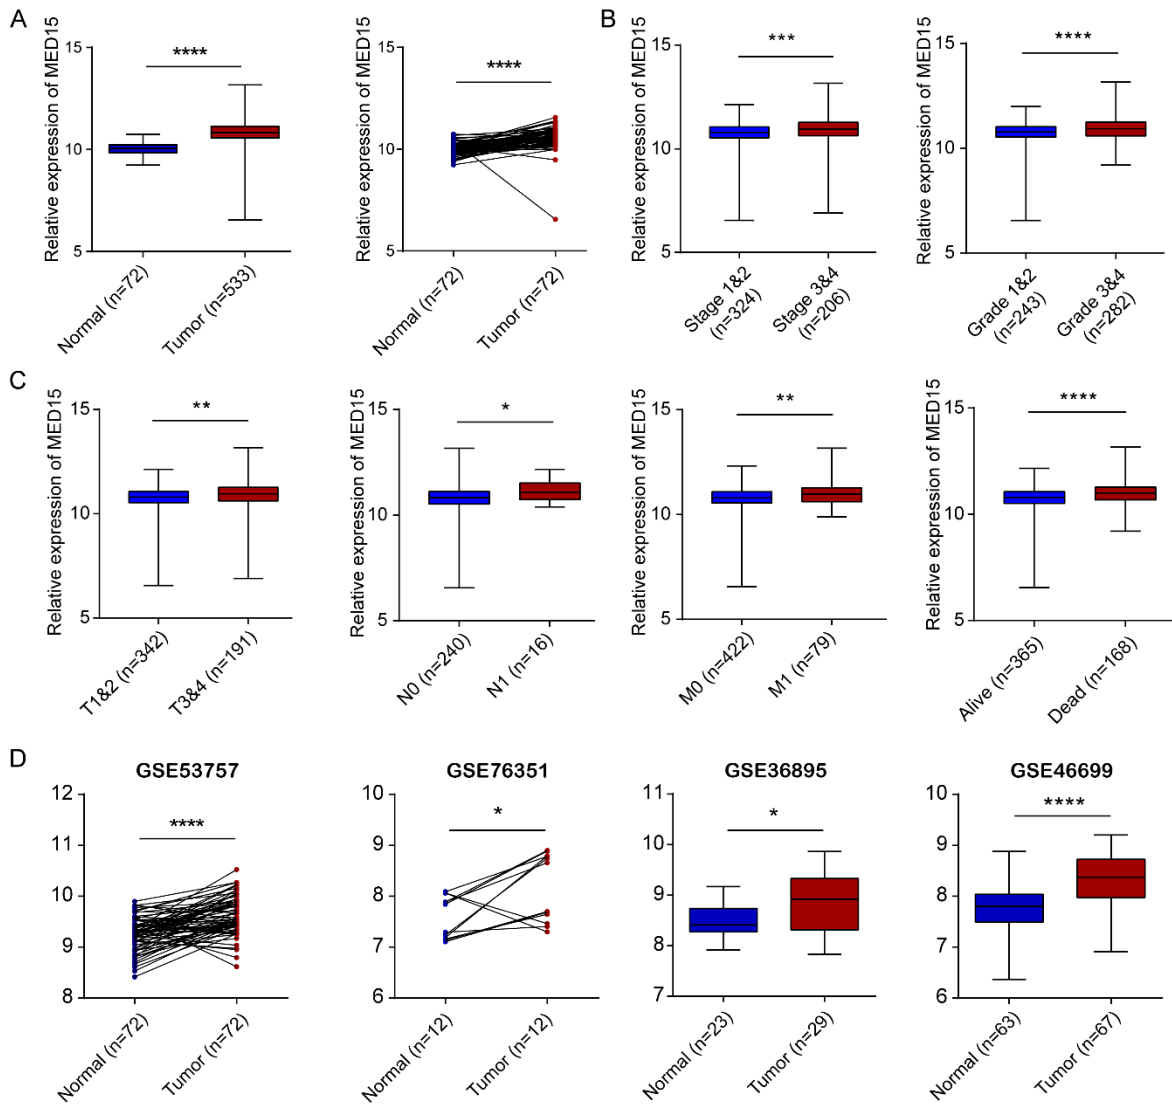

2

3 **Fig. S1. MED15 was upregulated in ccRCC and positively associated with clinicopathologic**

4 **features in publicly available datasets. (A) MED15 was upregulated in ccRCC samples in the TCGA**

5 **dataset. (B-C) The expression of MED15 was positively associated with clinicopathologic features in**

6 **the TCGA dataset. (D) MED15 was upregulated in ccRCC in four datasets from the GEO database.**

7 **The results are expressed as the mean  $\pm$  standard deviation (SD). \* indicates  $P < 0.05$ ; \*\* indicates  $P$**

8  **$< 0.01$ ; \*\*\* indicates  $P < 0.001$ ; \*\*\*\* indicates  $P < 0.0001$ .**

9

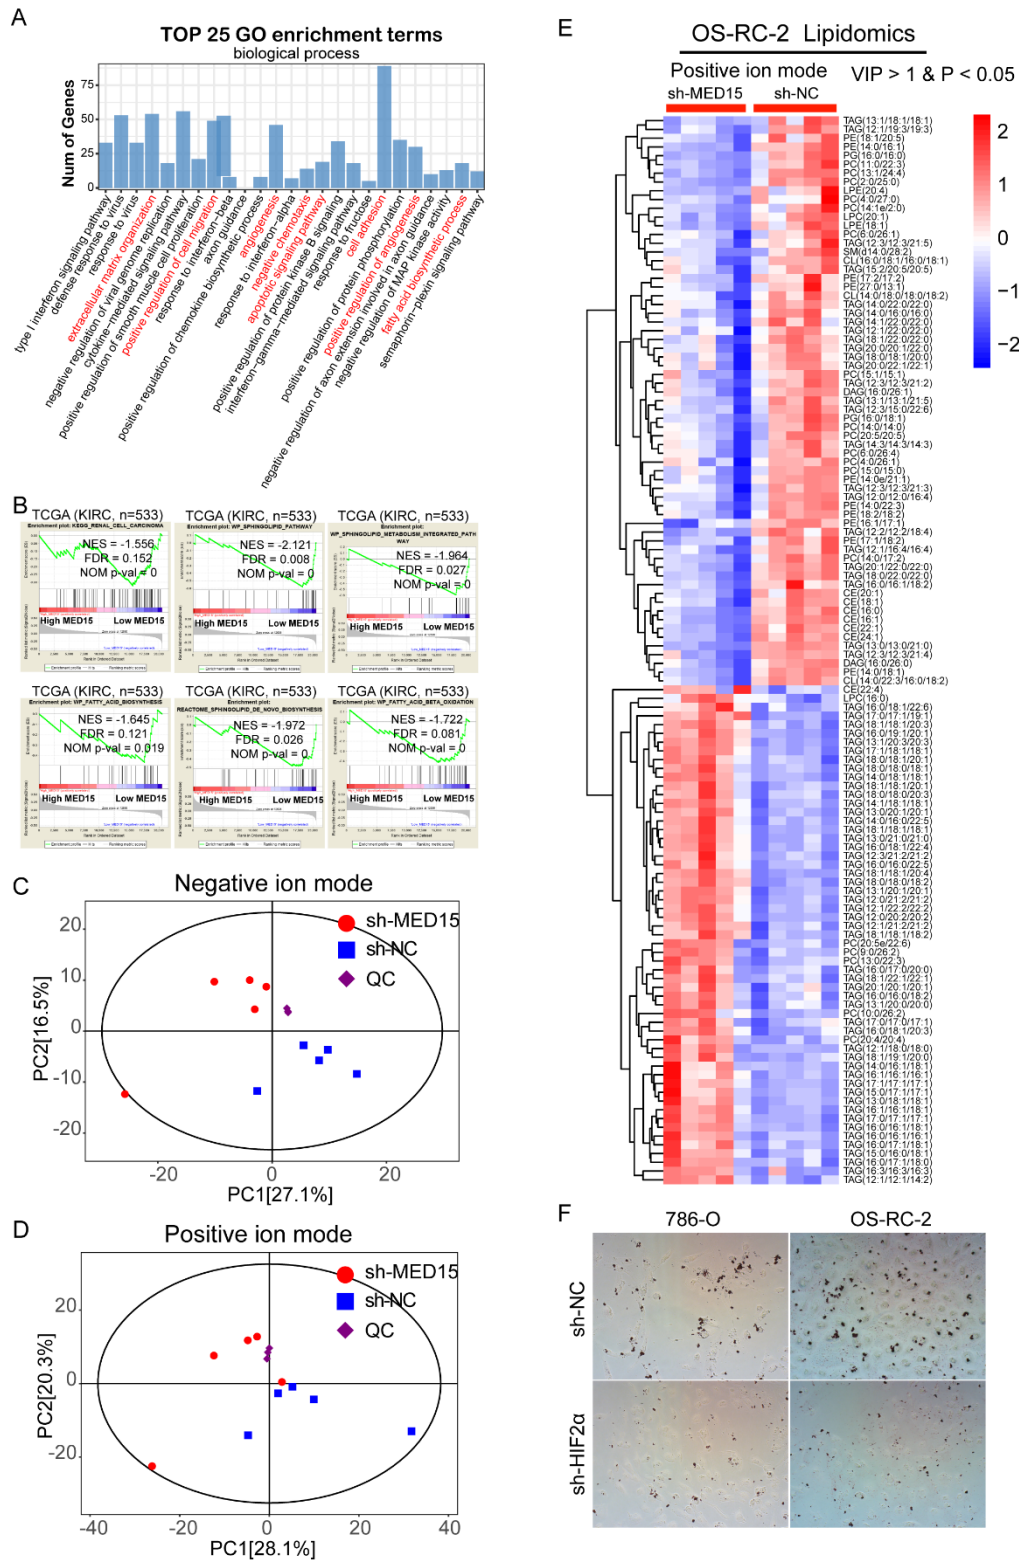

10

11 **Fig. S2. MED15 promoted tumor progression and lipid accumulation in ccRCC.** (A) The top 25  
 12 enriched biological process terms from the Gene Ontology (GO) enrichment analysis. (B) The enriched  
 13 lipid accumulation-related terms from the gene set enrichment analysis (GSEA) of TCGA data.  
 14 Principal component analysis of all lipid expression profiles detected for cells with or without MED15

15 knockdown in negative ion mode (C) and positive ion mode (D). (E) The differentially expressed lipid  
 16 components in positive ion mode were detected by LC/MS lipidomic assay in OS-RC-2 cells with or  
 17 without MED15 knockdown (n = 5). (F) Oil Red O staining in RCC cells with HIF-2 $\alpha$  knockdown.

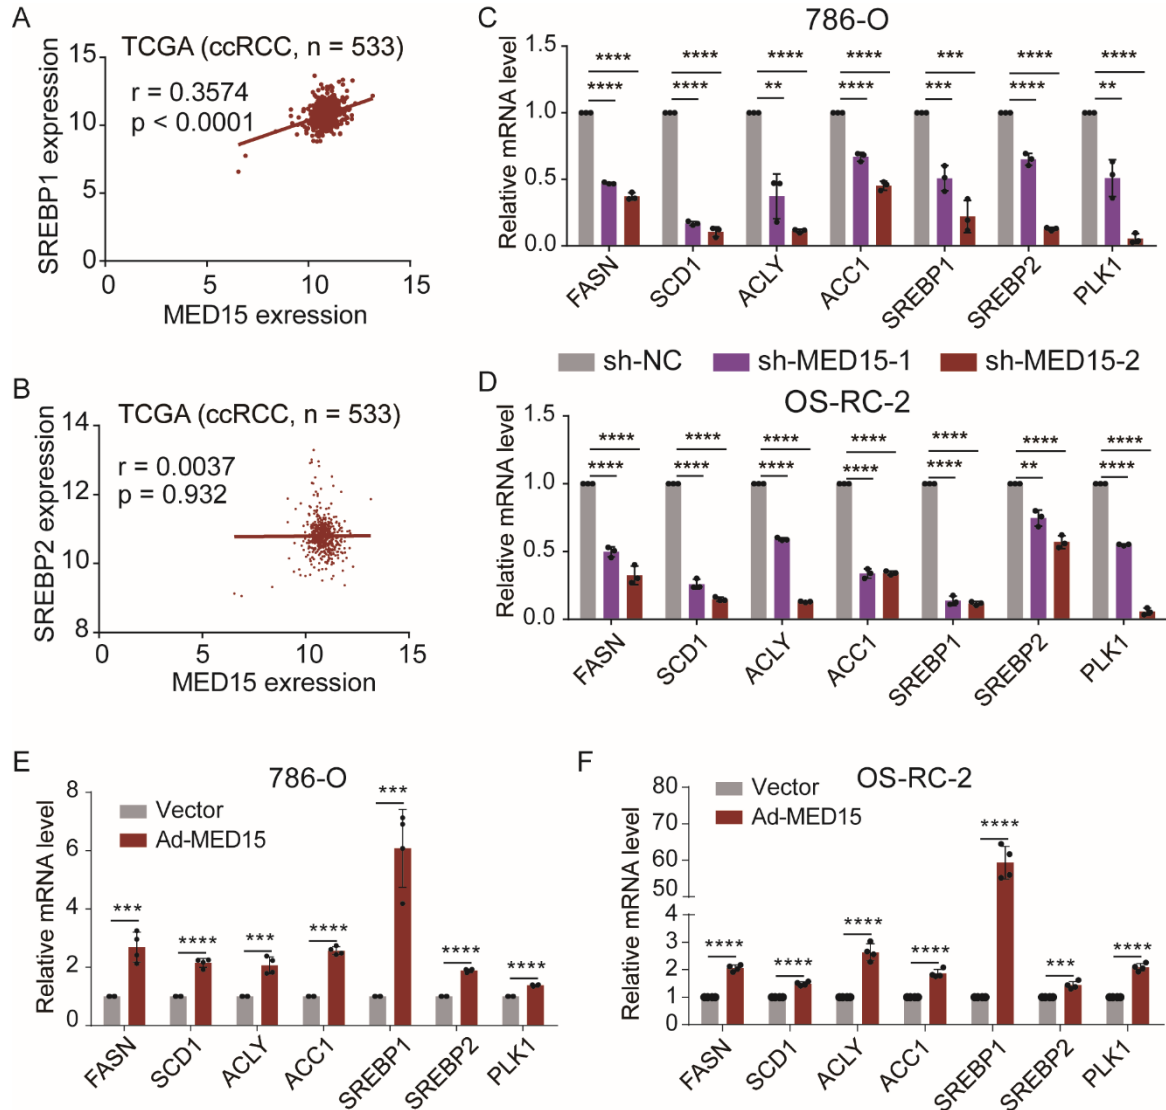

18  
 19 **Fig. S3. MED15 promoted the activation of the SREBP pathway.** (A-B) Correlations between  
 20 MED15 expression and SREBP1 and SREBP2 expression. (C-D) qRT-PCR showed decreased protein  
 21 levels of SREBP1, SREBP2, PLK1 and SREBP-dependent lipid biosynthesis enzymes (FASN, ACC1,  
 22 ACLY, and SCD1) in RCC cells with MED15 knockdown (n = 3). (E-F) qRT-PCR showed increased  
 23 protein levels of SREBP1, SREBP2, PLK1 and SREBP-dependent lipid biosynthesis enzymes (FASN,  
 24 ACC1, ACLY, and SCD1) in RCC cells overexpressing MED15 (n = 3). The results are expressed as  
 25 the mean  $\pm$  standard deviation (SD). \*\* indicates  $P < 0.01$ ; \*\*\* indicates  $P < 0.001$ ; \*\*\*\* indicates  $P$   
 26  $< 0.0001$ .

27

28 **Table S1.** Association between MED15 mRNA expression and clinicopathological characteristics of  
 29 patients with clear cell renal cell carcinoma.

| Variables   | Number     | MED15 mRNA expression |               | P value |
|-------------|------------|-----------------------|---------------|---------|
|             |            | High (n = 267)        | Low (n = 266) |         |
| Age (years) |            |                       |               | < 0.001 |
| ≤ 60        | 264 (49.5) | 145 (54.3)            | 119 (44.7)    |         |
| > 60        | 269 (50.5) | 122 (45.7)            | 147 (55.3)    |         |
| Gender      |            |                       |               | < 0.001 |
| Male        | 345 (64.7) | 176 (65.9)            | 169 (63.5)    |         |
| Female      | 188 (35.3) | 91 (34.1)             | 97 (36.5)     |         |
| Stage       |            |                       |               | 0.017   |
| I           | 267 (50.1) | 117 (43.8)            | 150 (56.4)    |         |
| II          | 57 (10.7)  | 27 (10.1)             | 30 (11.3)     |         |
| III         | 123 (23.1) | 70 (26.2)             | 53 (19.9)     |         |
| IV          | 83 (15.6)  | 51 (19.1)             | 32 (12.0)     |         |
| Unkonwn     | 3 (0.5)    | 2 (0.8)               | 1 (0.4)       |         |
| Grade       |            |                       |               | < 0.001 |
| G1          | 14 (2.6)   | 10 (3.7)              | 4 (1.4)       |         |
| G2          | 229 (43.0) | 95 (35.6)             | 134 (50.4)    |         |
| G3          | 206 (38.6) | 109 (40.8)            | 97 (36.5)     |         |
| G4          | 76 (14.3)  | 51 (19.1)             | 25 (9.4)      |         |
| Unkonwn     | 8 (1.5)    | 2 (0.8)               | 6 (2.3)       |         |
| T stage     |            |                       |               | 0.006   |
| T1          | 273 (51.2) | 119 (44.6)            | 154 (57.9)    |         |
| T2          | 69 (12.9)  | 34 (12.7)             | 35 (13.2)     |         |
| T3          | 180 (33.8) | 106 (39.7)            | 74 (27.8)     |         |
| T4          | 11 (2.1)   | 8 (3.0)               | 3 (1.1)       |         |
| N stage     |            |                       |               | 0.448   |
| N0/Nx       | 517 (97.0) | 257 (96.3)            | 260 (97.7)    |         |
| N1          | 16 (3.0)   | 10 (3.7)              | 6 (2.3)       |         |
| M stage     |            |                       |               | 0.051   |
| M0/Mx       | 454 (85.2) | 219 (82.0)            | 235 (88.3)    |         |
| M1          | 79 (14.8)  | 48 (18.0)             | 31 (11.7)     |         |
| Status      |            |                       |               | 0.001   |
| Alive       | 365 (68.5) | 165 (61.8)            | 200 (75.2)    |         |
| Dead        | 168 (31.5) | 102 (38.2)            | 66 (24.8)     |         |

30

31 **Table S2.** Univariate and multivariate analyses of MED15 mRNA level for overall survival of patients.

| Variables                  | Univariate analysis |             |         | Multivariate analysis |             |         |
|----------------------------|---------------------|-------------|---------|-----------------------|-------------|---------|
|                            | HR                  | 95% CI      | P value | HR                    | 95% CI      | P value |
| Overall survival (n = 517) |                     |             |         |                       |             |         |
| Age (years)                | 1.719               | 1.255-2.352 | < 0.001 | 1.651                 | 1.203-2.265 | 0.002   |
| ≤60 (n = 260)              |                     |             |         |                       |             |         |
| >60 (n = 257)              |                     |             |         |                       |             |         |
| Gender                     | 0.960               | 0.699-1.320 | 0.804   |                       |             |         |
| Female (n = 180)           |                     |             |         |                       |             |         |
| Male (n = 337)             |                     |             |         |                       |             |         |
| T stage                    | 1.987               | 1.680-2.350 | < 0.001 | 1.319                 | 1.070-1.626 | 0.009   |
| T1 or T2 (n = 330)         |                     |             |         |                       |             |         |
| T3 or T4 (n = 187)         |                     |             |         |                       |             |         |
| N stage                    | 3.545               | 1.866-6.732 | < 0.001 | 1.464                 | 0.743-2.883 | 0.271   |
| N0 or NX (n = 503)         |                     |             |         |                       |             |         |
| N1 (n = 14)                |                     |             |         |                       |             |         |
| M stage                    | 4.436               | 3.226-6.100 | < 0.001 | 2.332                 | 1.583-3.434 | < 0.001 |
| M0 or MX (n = 441)         |                     |             |         |                       |             |         |
| M1 (n = 76)                |                     |             |         |                       |             |         |
| Grade                      | 2.322               | 1.881-2.866 | < 0.001 | 1.474                 | 1.161-1.871 | 0.001   |
| G1 or G2 (n = 239)         |                     |             |         |                       |             |         |
| G3 or G4 (n = 278)         |                     |             |         |                       |             |         |
| MED15                      | 1.793               | 1.308-2.457 | < 0.001 | 1.518                 | 1.098-2.098 | 0.011   |
| Low (n = 258)              |                     |             |         |                       |             |         |
| High (n = 259)             |                     |             |         |                       |             |         |

32 HR: Hazard ratio. CI: Confidence interval.

33 Multivariate models are adjusted for T (tumor), N (lymph node), M (metastasis) classification, age,  
 34 stage, grade and MED15 expression level.

35

36 **Table S3.** Univariate and multivariate analyses of MED15 mRNA level for disease free survival (DFS)  
 37 of ccRCC patients.

| Variables          | Univariate analysis |              |         | Multivariate analysis |             |         |
|--------------------|---------------------|--------------|---------|-----------------------|-------------|---------|
|                    | HR                  | 95% CI       | P value | HR                    | 95% CI      | P value |
| DFS (n = 422)      |                     |              |         |                       |             |         |
| Age (years)        | 1.366               | 0.959-1.945  | 0.084   |                       |             |         |
| ≤60 (n = 230)      |                     |              |         |                       |             |         |
| >60 (n = 192)      |                     |              |         |                       |             |         |
| Gender             | 1.429               | 0.962-2.123  | 0.077   |                       |             |         |
| Female (n = 142)   |                     |              |         |                       |             |         |
| Male (n = 280)     |                     |              |         |                       |             |         |
| T stage            | 4.527               | 3.134-6.539  | < 0.001 | 2.056                 | 1.349-3.134 | 0.001   |
| T1 or T2 (n = 283) |                     |              |         |                       |             |         |
| T3 or T4 (n = 139) |                     |              |         |                       |             |         |
| N stage            | 5.955               | 2.990-11.861 | < 0.001 | 3.236                 | 1.600-6.545 | 0.001   |
| N0 or NX (n = 410) |                     |              |         |                       |             |         |
| N1 (n = 12)        |                     |              |         |                       |             |         |
| M stage            | 8.537               | 5.882-12.398 | < 0.001 | 5.271                 | 3.467-8.012 | < 0.001 |
| M0 or MX (n = 371) |                     |              |         |                       |             |         |
| M1 (n = 51)        |                     |              |         |                       |             |         |
| Grade              | 1.832               | 1.491-2.252  | < 0.001 | 1.557                 | 1.258-1.927 | < 0.001 |
| G1 or G2 (n = 208) |                     |              |         |                       |             |         |
| G3 or G4 (n = 214) |                     |              |         |                       |             |         |
| MED15              | 1.537               | 1.074-2.200  | 0.019   | 1.457                 | 1.016-2.090 | 0.041   |
| Low (n = 211)      |                     |              |         |                       |             |         |
| High (n = 211)     |                     |              |         |                       |             |         |

38 HR: Hazard ratio. CI: Confidence interval.

39 Multivariate models are adjusted for T (tumor), N (lymph node), M (metastasis) classification, age,  
 40 stage, grade and MED15 expression level.

41

42 **Table S4:** The results of immunohistochemical staining for MED15 and clinical characteristics in  
 43 tissue microarray.

| <b>HKidE180Su02</b> | <b>Tissue type</b> | <b>T</b> | <b>Status</b> | <b>Survival time (month)</b> | <b>MED15 expression</b> |
|---------------------|--------------------|----------|---------------|------------------------------|-------------------------|
| A01                 | Tumor              | T1       | alive         | 90                           | weak                    |
| A02                 | Normal             |          |               |                              | weak                    |
| A03                 | Tumor              | T1       | dead          | 14                           | moderate                |
| A04                 | Normal             |          |               |                              | moderate                |
| A05                 | Tumor              | T1       | alive         | 90                           | weak                    |
| A06                 | Normal             |          |               |                              | moderate                |
| A07                 | Tumor              | T1       | alive         | 90                           | moderate                |
| A08                 | Normal             |          |               |                              | moderate                |
| A09                 | Tumor              | T1       | dead          | 24                           | positive                |
| A10                 | Normal             |          |               |                              | weak                    |
| A11                 | Tumor              | T1       | alive         | 89                           | moderate                |
| A12                 | Normal             |          |               |                              | moderate                |
| A13                 | Tumor              | T1       | alive         | 88                           | moderate                |
| A14                 | Normal             |          |               |                              | moderate                |
| A15                 | Tumor              | T1       | alive         | 88                           | moderate                |
| A16                 | Normal             |          |               |                              | weak                    |
| A17                 | Tumor              | T1       | alive         | 88                           | moderate                |
| A18                 | Normal             |          |               |                              | weak                    |
| B01                 | Tumor              | T1       | alive         | 88                           | weak                    |
| B02                 | Normal             |          |               |                              | weak                    |
| B03                 | Tumor              | T1       | alive         | 88                           | weak                    |
| B04                 | Normal             |          |               |                              | weak                    |
| B05                 | Tumor              | T1       | alive         | 88                           | moderate                |
| B06                 | Normal             |          |               |                              | moderate                |
| B07                 | Tumor              | T3       | alive         | 88                           | positive                |
| B08                 | Normal             |          |               |                              | moderate                |
| B09                 | Tumor              | T1       | alive         | 88                           | moderate                |
| B10                 | Normal             |          |               |                              | moderate                |
| B11                 | Tumor              | T1       | alive         | 87                           | moderate                |
| B12                 | Normal             |          |               |                              | moderate                |
| B13                 | Tumor              | T2       | dead          | 38                           | positive                |
| B14                 | Normal             |          |               |                              | positive                |
| B15                 | Tumor              | T1       | alive         | 87                           | moderate                |
| B16                 | Normal             |          |               |                              | moderate                |
| B17                 | Tumor              | T1       | alive         | 87                           | moderate                |
| B18                 | Normal             |          |               |                              | weak                    |
| C01                 | Tumor              | T1       | alive         | 87                           | weak                    |
| C02                 | Normal             |          |               |                              | weak                    |
| C03                 | Tumor              | T2       | alive         | 87                           | positive                |

---

|     |        |    |       |    |  |          |
|-----|--------|----|-------|----|--|----------|
| C04 | Normal |    |       |    |  | moderate |
| C05 | Tumor  | T1 | alive | 86 |  | moderate |
| C06 | Normal |    |       |    |  | moderate |
| C07 | Tumor  | T1 | alive | 86 |  | moderate |
| C08 | Normal |    |       |    |  | moderate |
| C09 | Tumor  | T1 | alive | 86 |  | moderate |
| C10 | Normal |    |       |    |  | moderate |
| C11 | Tumor  | T1 | alive | 86 |  | positive |
| C12 | Normal |    |       |    |  | moderate |
| C13 | Tumor  | T1 | alive | 86 |  | moderate |
| C14 | Normal |    |       |    |  | moderate |
| C15 | Tumor  | T1 | alive | 86 |  | moderate |
| C16 | Normal |    |       |    |  | positive |
| C17 | Tumor  | T1 | alive | 86 |  | moderate |
| C18 | Normal |    |       |    |  | weak     |
| D01 | Tumor  | T1 | alive | 86 |  | moderate |
| D02 | Normal |    |       |    |  | moderate |
| D03 | Tumor  | T1 | alive | 86 |  | moderate |
| D04 | Normal |    |       |    |  | moderate |
| D05 | Tumor  | T2 | dead  | 31 |  | positive |
| D06 | Normal |    |       |    |  | moderate |
| D07 | Tumor  | T1 | alive | 85 |  | positive |
| D08 | Tumor  | T1 | dead  | 10 |  | positive |
| D09 | Tumor  | T2 | alive | 85 |  | positive |
| D10 | Tumor  | T1 | alive | 85 |  | positive |
| D11 | Tumor  | T1 | alive | 85 |  | positive |
| D12 | Tumor  | T1 | alive | 85 |  | moderate |
| D13 | Tumor  | T1 | alive | 85 |  | moderate |
| D14 | Tumor  | T3 | dead  | 41 |  | positive |
| D15 | Tumor  | T1 | alive | 85 |  | moderate |
| D16 | Tumor  | T1 | alive | 85 |  | weak     |
| D17 | Tumor  | T1 | alive | 85 |  | moderate |
| D18 | Tumor  | T3 | dead  | 52 |  | strong   |
| E01 | Tumor  | T2 | dead  | 15 |  | positive |
| E02 | Tumor  | T1 | alive | 84 |  | moderate |
| E03 | Tumor  | T3 | alive | 84 |  | positive |
| E04 | Tumor  | T1 | alive | 84 |  | moderate |
| E05 | Tumor  | T2 | alive | 84 |  | positive |
| E06 | Tumor  | T1 | alive | 84 |  | moderate |
| E07 | Tumor  | T2 | alive | 84 |  | positive |
| E08 | Tumor  | T1 | alive | 83 |  | moderate |
| E09 | Tumor  | T1 | alive | 83 |  | moderate |
| E10 | Tumor  | T2 | dead  | 46 |  | positive |
| E11 | Tumor  | T1 | dead  | 51 |  | positive |

---



---

|     |       |    |       |    |          |
|-----|-------|----|-------|----|----------|
| E12 | Tumor | T1 | alive | 81 | moderate |
| E13 | Tumor | T1 | alive | 81 | strong   |
| E14 | Tumor | T1 | alive | 81 | positive |
| E15 | Tumor | T1 | alive | 81 | moderate |
| E16 | Tumor | T1 | alive | 80 | moderate |
| E17 | Tumor | T1 | alive | 80 | moderate |
| E18 | Tumor | T1 | dead  | 51 | positive |
| F01 | Tumor | T1 | alive | 80 | positive |
| F02 | Tumor | T1 | dead  | 40 | weak     |
| F03 | Tumor | T1 | alive | 79 | moderate |
| F04 | Tumor | T1 | alive | 79 | moderate |
| F05 | Tumor | T1 | alive | 79 | moderate |
| F06 | Tumor | T1 | alive | 78 | strong   |
| F07 | Tumor | T1 | alive | 78 | positive |
| F08 | Tumor | T3 | dead  | 22 | strong   |
| F09 | Tumor | T2 | alive | 77 | strong   |
| F10 | Tumor | T1 | alive | 77 | positive |
| F11 | Tumor | T1 | alive | 77 | moderate |
| F12 | Tumor | T3 | dead  | 4  | positive |
| F13 | Tumor | T1 | alive | 77 | positive |
| F14 | Tumor | T1 | alive | 76 | moderate |
| F15 | Tumor | T1 | alive | 76 | positive |
| F16 | Tumor | T1 | alive | 76 | positive |
| F17 | Tumor | T2 | dead  | 38 | positive |
| F18 | Tumor | T3 | dead  | 7  | strong   |
| G01 | Tumor | T3 | dead  | 7  | positive |
| G02 | Tumor | T1 | alive | 76 | positive |
| G03 | Tumor | T1 | alive | 75 | positive |
| G04 | Tumor | T1 | alive | 75 | moderate |
| G05 | Tumor | T1 | alive | 75 | positive |
| G06 | Tumor | T1 | alive | 75 | positive |
| G07 | Tumor | T1 | alive | 74 | positive |
| G08 | Tumor | T1 | alive | 74 | positive |
| G09 | Tumor | T1 | alive | 74 | positive |
| G10 | Tumor | T1 | dead  | 21 | positive |
| G11 | Tumor | T1 | alive | 74 | positive |
| G12 | Tumor | T1 | alive | 74 | strong   |
| G13 | Tumor | T1 | alive | 74 | positive |
| G14 | Tumor | T2 | dead  | 4  | positive |
| G15 | Tumor | T3 | dead  | 5  | strong   |
| G16 | Tumor | T1 | alive | 73 | positive |
| G17 | Tumor | T2 | dead  | 14 | positive |
| G18 | Tumor | T1 | alive | 72 | moderate |
| H01 | Tumor | T1 | alive | 72 | moderate |

---

---

|     |       |    |       |    |          |
|-----|-------|----|-------|----|----------|
| H02 | Tumor | T1 | alive | 72 | weak     |
| H03 | Tumor | T3 | alive | 72 | strong   |
| H04 | Tumor | T1 | alive | 72 | positive |
| H05 | Tumor | T1 | alive | 72 | strong   |
| H06 | Tumor | T1 | alive | 72 | positive |
| H07 | Tumor | T1 | alive | 72 | positive |
| H08 | Tumor | T1 | alive | 72 | positive |
| H09 | Tumor | T1 | alive | 71 | strong   |
| H10 | Tumor | T1 | alive | 71 | positive |
| H11 | Tumor | T1 | alive | 71 | positive |
| H12 | Tumor | T1 | alive | 71 | positive |
| H13 | Tumor | T1 | alive | 71 | strong   |
| H14 | Tumor | T1 | alive | 71 | positive |
| H15 | Tumor | T1 | alive | 71 | positive |
| H16 | Tumor | T1 | alive | 71 | positive |
| H17 | Tumor | T1 | alive | 71 | positive |
| H18 | Tumor | T1 | alive | 70 | strong   |
| I01 | Tumor | T1 | dead  | 43 | positive |
| I02 | Tumor | T3 | alive | 70 | positive |
| I03 | Tumor | T1 | alive | 70 | strong   |
| I04 | Tumor | T1 | alive | 70 | positive |
| I05 | Tumor | T1 | alive | 70 | moderate |
| I06 | Tumor | T1 | alive | 69 | positive |
| I07 | Tumor | T1 | alive | 69 | strong   |
| I08 | Tumor | T1 | alive | 69 | moderate |
| I09 | Tumor | T2 | dead  | 33 | strong   |
| I10 | Tumor | T1 | alive | 69 | positive |
| I11 | Tumor | T1 | alive | 69 | positive |
| I12 | Tumor | T1 | alive | 69 | positive |
| I13 | Tumor | T1 | alive | 69 | positive |
| I14 | Tumor | T2 | alive | 68 | positive |
| I15 | Tumor | T1 | alive | 68 | positive |
| I16 | Tumor | T2 | alive | 68 | weak     |
| I17 | Tumor | T1 | alive | 68 | positive |
| I18 | Tumor | T1 | alive | 68 | positive |
| J01 | Tumor | T1 | dead  | 41 | positive |
| J02 | Tumor | T1 | dead  | 66 | positive |
| J03 | Tumor | T1 | alive | 67 | positive |
| J04 | Tumor | T1 | alive | 67 | positive |
| J05 | Tumor | T1 | alive | 67 | positive |
| J06 | Tumor | T1 | alive | 67 | positive |
| J07 | Tumor | T1 | dead  | 49 | positive |
| J08 | Tumor | T1 | alive | 67 | positive |
| J09 | Tumor | T1 | alive | 67 | positive |

---

---

|     |       |    |       |    |          |
|-----|-------|----|-------|----|----------|
| J10 | Tumor | T1 | alive | 67 | strong   |
| J11 | Tumor | T2 | dead  | 57 | positive |
| J12 | Tumor | T1 | dead  | 7  | positive |
| J13 | Tumor | T1 | alive | 66 | positive |
| J14 | Tumor | T1 | alive | 66 | positive |
| J15 | Tumor | T1 | alive | 66 | strong   |
| J16 | Tumor | T1 | alive | 65 | positive |
| J17 | Tumor | T1 | alive | 65 | positive |
| J18 | Tumor | T2 | alive | 65 | positive |

---

45 **Table S5:** Lentivirus construction information.

| <b>Name</b>         | <b>Gene ID</b> | <b>Genebank</b> | <b>Vector information</b>                                |
|---------------------|----------------|-----------------|----------------------------------------------------------|
| HIF2 $\alpha$ -RNAi | 2034           | NM_001430       | pHBLV-U6-MCS-CMV-ZsGreen-PGK-PURO                        |
| MED15-RNAi          | 51586          | NM_001293234    | hU6-MCS-Ubiquitin-EGFP-IRES-puromycin, GV248             |
| MED15               | 51586          | NM_015889       | CMV-MCS-3FLAG-EF1 $\alpha$ -mCherry-T2A-puromycin, GV661 |
| HIF2 $\alpha$       | 2034           | NM_001430       | Ubi-MCS-3FLAG-SV40-EGFP-IRES-puromycin, GV358            |

46

**Table S7:** Primers for qRT-PCR analysis.

| <b>Symbol</b>  | <b>Forward primer (5'--3')</b> | <b>Reverse primer (5'--3')</b> |
|----------------|--------------------------------|--------------------------------|
| HIF-2 $\alpha$ | CACCAAGGGTCAGGTAGTAAG          | CACCAAGGGTCAGGTAGTAAG          |
| MED15          | ATGGACGTTTCCGGGCAAG            | GCATCCTCGATTTGACTGACCA         |
| SREBP1         | ACAGTGACTTCCCTGGCCTAT          | GCATGGACGGGTACATCTTCAA         |
| SREBP2         | AACGGTCATTCACCCAGGTC           | GGCTGAAGAATAGGAGTTGCC          |
| FASN           | AAGGACCTGTCTAGGTTTGATGC        | TGGCTTCATAGGTGACTTCCA          |
| SCD1           | GCCCCTCTACTTGGAAGACGA          | AAGTGATCCCATACAGGGCTC          |
| ACC1           | CATGCGGTCTATCCGTAGGTG          | GTGTGACCATGACAACGAATCT         |
| ACLY           | ATCGGTTCAAGTATGCTCGGG          | GACCAAGTTTTCCACGACGTT          |
| PLK1           | CACCAGCACGTCGTAGGATTC          | CCGTAGGTAGTATCGGGCCTC          |
| GAPDH          | GGGAGCCAAAAGGGTCAT             | GAGTCCTTCCACGATACCAA           |

**Table S8:** List of primers for chromatin immunoprecipitation assay.

| <b>Symbol</b>    | <b>Forward primer (5'--3')</b> | <b>Reverse primer (5'--3')</b> |
|------------------|--------------------------------|--------------------------------|
| Negative control | AACCCCGGTCAAGATGATCACTC        | TTCTCCTGCCTCAGCCTCCCAAG        |
| Site 1           | ACTGGAAGAGGGGCGTGTGT           | GAAATGGAGTCTCGCGCACAG          |
| Site 2           | TGGCTGCTGGTCAAAAGGGAA          | TGGACTCTCATCACCGCTTCA          |
| Site 3           | CCCATAACCCCTCATCCCACC          | AGACATGGGCTTTCCCTTTTG          |
| Site 4           | GGTGGGGTACGCTTGTAATC           | GGGATAGAATTTAGCCCTTGT          |
| VEGF             | CTTTGGGTTTTGCCAGACTCC          | GGAAGTGTCCAGGGATGCT            |

**Table S9:** The specific sequences of truncated plasmid.

**Site 1--(MED15)**

CGTTGCACTGGCACACAGTAGGTACCCACACATATTTGATAAAATAAACACTCTCTCCCT  
AGCATTACTATAGATAGCTGGCAGCTTGGCCTGGCATCCCGGAGGGGTCTGGATCTCAG  
GGACTAGATAAGGCCAGCACACTGAAGAGTTGCAGAAAATGCAGGCGGTTCAGGCGCAG  
GTCTGCTGCGGGAGCACCTGCCGTGTCCGACAGCTGCACTGGAAGAGGGG**GCGTG**TGTCT  
CCCAGCCGGGCGGAACCGAGACCGCTTCGTCCCCGGCGGGGAACCTTCATTTCCCACAAG  
CCTGTGCGCGAGACTCCATTTCCCACAAGCCCTCCTTCACTTCCGGCTCGGCCGAGGCA

**Site 2+ Site 1--(MED15)**

CAAAAGGGAAAGCCCATGTCTAAAAATTAATTA**ACGTG**GTTTAGGGGCCTCACATTCCC  
AACCCCAAATACAGCCATTGTGAGATGTGAGATTCAAAAATCGAAGAGTGAAGCGG  
TGATGAGAGTCCATCTGGTCGCTCTTCGGATGCGGCGCTAGCAGGCAGTTGCATGAAAG  
CAGATCCCAGATCACGTTGCACTGGCACACAGTAGGTACCCACACATATTTGATAAATA  
AACACTCTCTCCCTAGCATTACTATAGATAGCTGGCAGCTTGGCCTGGCATCCCGGAGG  
GGTCTGGATCTCAGGGACTAGATAAGGCCAGCACACTGAAGAGTTGCAGAAAATGCAG  
GCGGTCAGGCGCAGGTCTGCTGCGGGAGCACCTGCCGTGTCCGACAGCTGCACTGGAA  
GAGGG**GCGTG**TGTCTCCCAGCCGGGCGGAACCGAGACCGCTTCGTCCCCGGCGGGGAA  
CTTCATTTCCCACAAGCCTGTGCGCGAGACTCCATTTCCCACAAGCCCTCCTTCACTTCC  
GGCTCGGCCGAGGCA

**Site 3+ Site 2+ Site 1--(MED15)**

CTCCCACCCACTCTCTACCACCTTCAACCTCCTGTCTGGGGCACAGTAACAAGGGGTGT  
AAGGGGTGTACAGTGCCTAGCAGGGGCCTGGCACTTAGGCTTCAGTAGGTGCCAGTCCA  
CAGTCTCCTGAGGCCCATGTTGGTTGGTGTCCACCTGGTGCTTATTGACCACTTGGGCTC  
CAGATTTTCTCCTCACGTCACCTCCCTCCCCAGGGTAGCAGATAAAGGCCCCATAGTTCCA  
AGGAGGCAGAACTTTTACATTCTAAAGCATTCTCAGGCCCCCAATAACCCCTCATCCC  
ACCTTCAGCTCGCTCACCTTCACCTATCAAATTCGTTTGACATCTGGCCTCCAGCAACTA  
GCTAGGCTGAGTTCTCCATGAAGGGG**ACGTG**GGTGTCTGGTCAAAGGGAAAGCCCATG  
TCTAAAAATTAATTA**ACGTG**GTTTAGGGGCCTCACATTCCCAACCCCAAATACAGCCA  
TTGTGAGATGTGAGATTCAAAAATCGAAGAGTGAAGCGGTGATGAGAGTCCATCTGGT  
CGCTCTTCGGATGCGGCGCTAGCAGGCAGTTGCATGAAAGCAGATCCCAGATCACGTTG  
CACTGGCACACAGTAGGTACCCACACATATTTGATAAATAAACACTCTCTCCCTAGCAT  
TACTATAGATAGCTGGCAGCTTGGCCTGGCATCCCGGAGGGGTCTGGATCTCAGGGACT  
AGATAAGGCCAGCACACTGAAGAGTTGCAGAAAATGCAGGCGGTTCAGGCGCAGGTCTG  
CTGCGGGAGCACCTGCCGTGTCCGACAGCTGCACTGGAAGAGGG**GCGTG**TGTCTCCCAG  
CCGGGCGGAACCGAGACCGCTTCGTCCCCGGCGGGGAACCTTCATTTCCCACAAGCCTGT  
GCGCGAGACTCCATTTCCCACAAGCCCTCCTTCACTTCCGGCTCGGCCGAGGCA

**Site 4+ Site 3+ Site 2+ Site 1--(MED15)**

CAAAAATTAGCCAGGCATGGTGGGGTACGCTTGTAATCCCAGCTACTGGGGAAGCTGA  
GGTGGGAGAATT**GCGTG**AACCCGGGAGACAGAGGTTGCAGTGAGCCGAGATGGCACCA  
CTGCACTCCAGCCTGGCCAACAAGGGCTAAATTCTATCCCCCCCCCTCAAAAAAACA

ATAACGATTTTGGGAGTATTAGAGCAGAAAACGTTTGAAAACATGAACAGCTCTCACAT  
CAACACAAGACATGAAACTCTGTTGGCAAGAGAGGCCTCTTTGGGGAGAGTGCTCACTC  
CTCTCCCACCCACTCTCTACCACCTTCAACCTCCTGTCTGGGGCACAGTAACAAGGGGTG  
TAAGGGGTGTACAGTGCCTAGCAGGGGCCTGGCACTTAGGCTTCAGTAGGTGCCAGTCC  
ACAGTCTCCTGAGGCCCATGTTGGTTGGTGTCCACCTGGTGCTTATTGACCACTTGGGCT  
CCAGATTTTCCTCACGTACCTCCCTCCCCAGGGTAGCAGATAAAGGCCCCATAGTTC  
AAGGAGGCAGAACTTTTACATTCTAAAAGCATTCTCAGGCCCCATAACCCCTCATCC  
CACCTTCAGCTCGCTCACCTTCACCTATCAAATTCGTTTGACATCTGGCCTCCAGCAACT  
AGCTAGGCTGAGTTCTCCATGAAGGGGACGTGCTGGTCAAAGGGAAAGCCCAT  
GTCTAAAATTAATTAACGTGTTTAGGGGCCTCACATTCCCAACCCCAAATACAGCC  
ATTGTGAGATGTGAGATTCAAAAAATCGAAGAGTGAAGCGGTGATGAGAGTCCATCTG  
GTCGCTCTTCGGATGCGGCGCTAGCAGGCAGTTGCATGAAAGCAGATCCCAGATCACGT  
TGCACTGGCACACAGTAGGTACCCACACATATTTGATAAATAAACACTCTCTCCCTAGC  
ATTACTATAGATAGCTGGCAGCTTGGCCTGGCATCCCGGAGGGGTCTGGATCTCAGGGA  
CTAGATAAGGCCAGCACACTGAAGAGTTGCAGAAAATGCAGGCGGTGAGGCGCAGGTC  
TGCTGCGGGAGCACCTGCCGTGTCCGACAGCTGCACTGGAAGAGGGGCGGTGTCTCCC  
AGCCGGGCGGAACCGAGACCGCTTCGTCCCCGGCGGGAACTTCATTTCCACAAGCCT  
GTGCGCGAGACTCCATTTCCACAAGCCCTCCTTCACTTCCGGCTCGGCCGAGGCA

**Table S10.** Publicly-available datasets used in the study.

| <b>Dataset</b> | <b>Samples</b> | <b>Data Array</b>                              | <b>Sample Description</b>                  | <b>Reference</b>                                                 |
|----------------|----------------|------------------------------------------------|--------------------------------------------|------------------------------------------------------------------|
| TCGA           | 605            | RNA-seq                                        | 72 normal samples and<br>533 ccRCC samples | <a href="https://xenabrowser.net/">https://xenabrowser.net/</a>  |
| GSE53757       | 144            | Affymetrix Human Genome<br>U133 Plus 2.0 Array | 72 normal samples and<br>72 ccRCC samples  | von Roemeling CA, et al. <i>Cancer Res.</i> 2014;74(17):4796-810 |
| GSE76351       | 24             | Affymetrix Human Gene 1.1 ST<br>Array          | 12 normal samples and<br>12 ccRCC samples  | None                                                             |
| GSE36895       | 52             | Affymetrix Human Genome<br>U133 Plus 2.0 Array | 23 normal samples and<br>29 ccRCC samples  | Peña-Llopis S, et al. <i>Nat Genet.</i> 2012;44(7):751-9         |
| GSE46699       | 130            | Affymetrix Human Genome<br>U133 Plus 2.0 Array | 63 normal samples and<br>67 ccRCC samples  | Eckel-Passow JE, et al. <i>Carcinogenesis.</i> 2014; 35(4):822-7 |

Abbreviations: GSE, data set accession ID in Gene Expression Omnibus; TCGA, The Cancer Genome Atlas; ccRCC, clear cell renal cell carcinoma.



**Table S11:** The list of lipid metabolism-related gene set.

|         |         |            |            |          |         |          |          |
|---------|---------|------------|------------|----------|---------|----------|----------|
| NFYA    | GDE1    | MBTPS2     | AGPAT4     | THRAP3   | CTSA    | SLC44A1  | PTGS2    |
| CYP51A1 | NR1H4   | AC003665.1 | PNPLA6     | GALC     | FAR2    | GBA2     | MGLL     |
| MTMR7   | AGK     | ELOVL5     | CYP46A1    | TBXAS1   | ME1     | CHAT     | HACD3    |
| NDUFAB1 | ALDH3B1 | ALOX5      | PI4K2B     | ACAA1    | NFYC    | CSNK2A2  | ACAT1    |
| ACSM3   | ARSD    | DPEP1      | INPP4A     | ARSF     | ELOVL1  | OSBPL3   | PLD1     |
| CREBBP  | PNPLA4  | AGPS       | MED17      | DGAT2    | IDI1    | PRKACA   | ACACB    |
| TSPOAP1 | MED24   | CYP24A1    | HEXB       | SPHK2    | PLPP1   | ALDH3A2  | ACER3    |
| PON1    | OSBPL5  | STARD3NL   | PIK3CB     | MED29    | ACSL4   | SREBF1   | PIK3C3   |
| CROT    | ABHD5   | ALAS1      | PLEKHA5    | AHRR     | RORA    | ACADVL   | SYNJ2    |
| ABCB4   | PIK3C2A | NR1H3      | MSMO1      | MTMR1    | PLA2G10 | ABCB11   | OSBPL6   |
| PCYT1B  | INSIG2  | PPARD      | TGS1       | INPP5E   | MTMR14  | PPP1CA   | ELOVL2   |
| GLA     | MED1    | CCNC       | FDX1       | ANKRD1   | PLB1    | CYP7B1   | HSD17B11 |
| GDPD3   | GPCPD1  | MED23      | CYP19A1    | CYP17A1  | LIPH    | DHCR7    | TXNRD1   |
| VAC14   | NR1D1   | ACOT13     | SLC44A5    | HSD17B12 | SGMS2   | LCLAT1   | AKR1C4   |
| SMPD3   | SGPP1   | FIG4       | SELENOI    | FADS1    | BDH2    | ACSM6    | NCOA6    |
| PLA2G15 | PLAAT1  | FAM120B    | HADHB      | TM7SF2   | ETNPPL  | ESRRA    | ECI2     |
| FA2H    | PLA2G5  | HMGCS1     | CYP1B1     | MTMR12   | HPGD    | ARV1     | OXCT2    |
| MLYCD   | SIN3B   | HMGCR      | CYP2C9     | PIP4K2A  | ELOVL7  | PHOSPHO1 | GK       |
| ABCC1   | ECHS1   | COL4A3BP   | CYP2C8     | SEC24D   | STARD4  | STARD6   | INPP5F   |
| UBE2I   | SRD5A3  | ARSB       | CH25H      | THRSP    | ARSK    | UGT8     | SREBF2   |
| CDIPT   | ORMDL1  | SEC24A     | GPAT3      | MMAA     | ENPP6   | PTDSS2   | SGMS1    |
| ACSBG1  | SUMF2   | EHHADH     | HADH       | AKR1C2   | ACSL6   | PCCA     | HSD3B1   |
| DECR1   | PLD2    | PCCB       | SEC24B     | ACSL1    | FABP7   | MED16    | HSD3B2   |
| SQLE    | SLC44A2 | BCHE       | PIK3C2G    | OLAH     | FABP5   | GPX2     | NEU4     |
| MTMR9   | SLC27A1 | SCAP       | ETNK1      | GPD1L    | MED30   | SPHK1    | AWAT1    |
| ASAH1   | ACSBG2  | PIKFYVE    | GLIPR1     | SAR1B    | ABCA1   | CIDEA    | HSD17B8  |
| LHB     | HELZ2   | POMC       | GLTP       | GGPS1    | PRKACG  | ACBD7    | RXRβ     |
| MED25   | CYP2E1  | GPD2       | MTMR6      | MED21    | MID1IP1 | HSD11B2  | AGPAT1   |
| MED26   | PNPLA7  | ACADL      | CERS5      | ACOXL    | SPTSSA  | LPCAT4   | SLC44A4  |
| PLD3    | OSBPL2  | PECR       | ESYT1      | PLA2R1   | INPPL1  | PLAAT3   | NEU1     |
| PIAS4   | MED18   | NEU2       | FITM1      | LPCAT1   | FAAH2   | ACSF3    | CSNK2B   |
| PRKD2   | HSD17B3 | FHL2       | PTGR2      | GDPD1    | PIP4P1  | RUFY1    | FABP9    |
| PLIN3   | PPT1    | PRKD3      | SLC27A2    | CERS3    | CYP2C19 | SEC24C   | CPT1B    |
| SULT2A1 | HACL1   | PLEKHA3    | NCOA2      | CYP2U1   | HACD1   | ACER2    | ARSH     |
| PLA2G4C | NR1H2   | DHCR24     | CYP11A1    | CDK19    | SGPL1   | CHD9     | ACOT6    |
| PLEKHA4 | ACLY    | SCP2       | CYP1A1     | AGPAT5   | SMPD1   | ACOT4    | TECRL    |
| PIK3R2  | STARD3  | MECR       | CYP1A2     | PI4K2A   | MOGAT2  | TBL1XR1  | PLPP6    |
| PIK3CG  | PRKAB2  | PLA2G4A    | AC092724.1 | DBI      | PLD4    | GBA      | HACD2    |
| PON3    | PPARG   | HAO2       | MBTPS1     | PPARGC1B | PLIN1   | PNPLA2   | SACMIL   |
| PON2    | HSD17B7 | GNPAT      | MED9       | MED7     | PEX11A  | SLC25A20 | LTC4S    |
| CAV1    | RAN     | ACADM      | NCOR1      | PTDSS1   | PIP4K2C | CPNE7    | HEXA     |
| PLEKHA8 | INPP5K  | PLA2G2D    | DPEP3      | MED19    | MTMR10  | CYP11B2  | PPP1CB   |

|          |         |          |         |         |          |           |         |
|----------|---------|----------|---------|---------|----------|-----------|---------|
| MOGAT3   | GPS2    | HMGCL    | PCTP    | SAMD8   | ACSF2    | ALOXE3    | NUDT19  |
| NRF1     | ALDH3B2 | PIK3R3   | ARSG    | CPT2    | DPEP2    | ALOX12B   | CPNE1   |
| AHR      | LPIN3   | FAAH     | OSBPL1A | ARSE    | ACAA2    | ALOX15B   | STARD10 |
| PRKAG2   | TPTE2   | HSD11B1  | PIK3R5  | PRXL2B  | GPX4     | PLD6      | PPT2    |
| PTGR1    | CDK8    | OSBPL9   | PLPP2   | ABHD3   | MVD      | TMEM86B   | CERS1   |
| PIP5K1B  | ALOX5AP | ESYT2    | CARM1   | ESYT3   | GPD1     | MED14     | CPTP    |
| PTGDS    | PEMT    | APOA1    | PRKACB  | GDPD5   | ACER1    | CYP8B1    | AKR1B15 |
| PHYH     | PIK3C2B | ELOVL4   | CYP4B1  | GPAT4   | ANGPTL4  | MIGA1     | GK3P    |
| CUBN     | CSNK1G2 | MED28    | SLC44A3 | PLA2G2F | CYP7A1   | ARSJ      | ACBD6   |
| PLEKHA1  | PLAAT4  | RAB14    | RGL1    | APOA2   | ECI1     | PITPNB    | CYP21A2 |
| ACBD5    | PLAAT2  | KDSR     | PI4KB   | SYNJ1   | PLAAT5   | ACBD4     | GPX1    |
| MTMR4    | MED10   | ACOT2    | PIP5K1A | CBR1    | RAB4A    | ENPP7     | ACAD11  |
| KPNB1    | MORC2   | ELOVL3   | CERS2   | PLA2G4D | ACOX2    | TNFAIP8L3 | UGT1A9  |
| MED13    | ARNTL   | GPAM     | ARNT    | THEM4   | DEGS2    | ARSI      | PISD    |
| MED31    | SBF2    | ACAT2    | SLC27A3 | MED8    | MFSD2A   | DGAT2L6   | PI4KA   |
| HSD17B1  | HSD17B4 | NFYB     | DEGS1   | AGPAT3  | GSTM4    | ACOT1     | AMACR   |
| ALOX12   | MED6    | EPHX2    | ARF1    | LSS     | PLA2G4F  | PRKD1     | DECR2   |
| ABCC3    | HMGCS2  | PLBD1    | MBOAT2  | MED27   | INPP5D   | PLA2G6    | PLA2G4B |
| DHRS7B   | CEPT1   | FABP3    | LBR     | FDPS    | B3GALNT1 | MED12     | HTD2    |
| INPP4B   | ARF3    | PIK3CA   | ETNK2   | CYP3A4  | SIN3A    | DGAT1     | FDX2    |
| PPARGC1A | GRHL1   | OCRL     | PLEKHA6 | CYP11B1 | PLEKHA2  | INPP5J    | TPTE    |
| SC5D     | LPIN1   | AKR1D1   | SUMF1   | PCYT1A  | AGPAT2   | TNFAIP8L1 | PIK3R6  |
| OSBP     | SLCO1B1 | ACADS    | RAB5A   | BDH1    | FASN     | SP1       | PIP4K2B |
| CPT1A    | CYP2J2  | MED13L   | OSBPL10 | FDXR    | FABP6    | PCYT2     | SRD5A2  |
| APOA5    | FADS2   | ACOT9    | PLA1A   | ACOX1   | GLB1     | CYP2R1    | ACACA   |
| PTPMT1   | CLOCK   | ORMDL2   | SCD5    | ALOX15  | FABP4    | PIP5K1C   | SLCO1B3 |
| PITPNM1  | CD36    | LPGAT1   | GC      | MED11   | NPAS2    | CYP4F2    | MBOAT7  |
| CHKA     | PNPLA8  | G0S2     | FABP2   | NEU3    | HSD17B13 | GPAT2     | EBP     |
| MVK      | HILPDA  | PLA2G12A | CBR4    | CYP4A22 | ELOVL6   | PPP1CC    | AWAT2   |
| PTGES3   | CGA     | ACSL3    | SRD5A1  | ACOT11  | PLA2G1B  | RXRA      | NSDHL   |
| CYP27B1  | BAAT    | MOGAT1   | PIK3R1  | PLPP3   | MTM1     | INSIG1    | STAR    |
| ACSS3    | SMPD4   | B4GALNT1 | ACAD10  | LTA4H   | CHPT1    | VDR       | LPCAT3  |
| LIPE     | HADHA   | MTMR8    | LIPI    | CPNE6   | ARNT2    | MTMR3     | CYP4F3  |
| FDFT1    | AKR1B1  | TAZ      | AKR1C3  | SEC23A  | ACOT12   | PNPLA5    | PPARA   |
| LRP2     | CPNE3   | LPCAT2   | THEM5   | TRIB3   | ALPI     | PNPLA3    | CYP4A11 |
| AACS     | DDHD2   | CRLS1    | PIK3R4  | CSNK2A1 | PMVK     | SLC25A17  | AKR1C1  |
| SMARCD3  | HSD17B2 | SPTLC1   | GK2     | SCD     | GLB1L    | EP300     | CIDEC   |
| OXCT1    | ACOX3   | CERS4    | NCOR2   | HSD3B7  | FABP1    | PRKAA2    | PIK3CD  |
| SLC27A5  | MTMR2   | PITPNM2  | SPTSSB  | TECR    | PPM1L    | ACP6      | HDAC3   |
| STARD7   | CRAT    | OSBPL8   | GM2A    | MED15   | CDS1     | MAPKAPK2  | PTEN    |
| SLCO1A2  | ACHE    | PITPNM3  | ACSL5   | GGT5    | PTPN13   | SGPP2     | CYP4F11 |
| NCOA1    | PGS1    | PTGS1    | FITM2   | GGT1    | ALB      | HPGDS     | CYP4F22 |
| AGMO     | CDS2    | HSD17B14 | SLC22A5 | SLC25A1 | IDI2     | TNFAIP8L2 | ORMDL3  |

|         |       |         |        |        |        |         |          |
|---------|-------|---------|--------|--------|--------|---------|----------|
| PLA2G4E | ACOT8 | ACOT7   | FABP12 | PLA2G3 | PLIN2  | NCOA3   | TNFAIP8  |
| PLA2G2A | VAPA  | CERK    | FAR1   | CYP2D6 | UGCG   | VAPB    | TNFRSF21 |
| ASAH2   | LPIN2 | ABHD4   | PSAP   | SBF1   | MED22  | PTGIS   | MMUT     |
| SUMO2   | STS   | DDHD1   | MBOAT1 | CHKB   | PTGES2 | MCEE    | HMGCLL1  |
| PLA2G2E | TBL1X | SPTLC2  | CERS6  | MCAT   | MIGA2  | MED20   | CYP39A1  |
| MTF1    | ABCD1 | LGMN    | SPTLC3 | ARSA   | PTGES  | SLC10A2 | TIAM2    |
| HACD4   | BMX   | SLC10A1 | STARD5 | TSPO   | CYP4F8 | CYP27A1 | SMPD2    |
| MED4    | AGT   |         |        |        |        |         |          |
